# Supplementary material for: Synthesis of 10-O-aryl-substituted berberine derivatives by Chan–Evans–Lam coupling and investigation of their DNA-binding properties
Source: publisher site journal article supplement (doi:10.3762/bjoc.17.81), 2021-05-04
Supplement: Additional file 1 [file 1860-5397-17-81-S1.pdf]

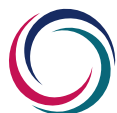

## Supporting Information

for

### **Synthesis of 10-O-aryl-substituted berberine derivatives by Chan–Evans–Lam coupling and investigation of their DNA-binding properties**

Peter Jonas Wickhorst, Mathilda Blachnik, Denisa Lagumdzija and Heiko Ihmels

*Beilstein J. Org. Chem.* **2021**, *17*, 991–1000. [doi:10.3762/bjoc.17.81](https://doi.org/10.3762/bjoc.17.81)

**Experimental procedures, syntheses, additional spectroscopic data,  $^1\text{H}$  NMR and  $^{13}\text{C}$  NMR spectra**

## Table of Contents

|                                                     |     |
|-----------------------------------------------------|-----|
| 1. Synthesis                                        | S2  |
| 2. Photophysical properties                         | S10 |
| 3. Determination of the fluorescence quantum yields | S12 |
| 4. Photometric and fluorimetric DNA titrations      | S13 |
| 5. CD- and LD-spectroscopic analysis                | S17 |
| 6. Thermal DNA-denaturation experiments             | S18 |
| 7. NMR spectra                                      | S20 |
| 8. References                                       | S32 |

## 1. Synthesis

### General Procedure for the Chan–Evans–Lam coupling reaction of berberrubine with arylboronic acids (GP 1).

A mixture of berberrubine (**1b**, 240 mg, 750  $\mu\text{mol}$ ),  $\text{Cu}(\text{OAc})_2$  (150 mg, 750  $\mu\text{mol}$ ), triethylamine (420  $\mu\text{L}$ , 3.00 mmol), molecular sieves (4 Å) and the respective arylboronic acid (3.00 mmol) in DMF (5 mL) was stirred for 16 h at rt. To the reaction mixture was added  $\text{CH}_2\text{Cl}_2$  (100 mL) and aq. HBr solution (1 M, 30 mL), and the organic layer was separated. The aqueous layer was extracted with  $\text{CH}_2\text{Cl}_2$  (30 mL), and the combined organic layers were washed with saturated aqueous  $\text{NaHCO}_3$  solution (20 mL), separated, and dried with  $\text{Na}_2\text{SO}_4$ . The drying agent was filtered off and the solvent was removed by distillation. The crude product was purified by flash column chromatography ( $\text{SiO}_2$ ,  $\text{CH}_2\text{Cl}_2/\text{MeOH}$  0%  $\rightarrow$  7%) and washed with acetone (20 mL) to obtain the desired product.

### *10-Phenoxy-5,6-dihydro-[1,3]dioxolo[4,5-g]isoquinolino[3,2-a]isoquinolin-7-ium-9-olate* (**4a**).

According to GP 1 the reaction of **1b** (240 mg, 750  $\mu\text{mol}$ ) with **3a** (365 mg, 3.00 mmol) gave product **4a** as red solid (74.8 mg, 195  $\mu\text{mol}$ , 26%); mp > 300 °C (dec.). –  $^1\text{H}$  NMR of **4a** x  $\text{CF}_3\text{COOD}$  (500 MHz,  $\text{DMSO}-d_6$  +  $\text{CF}_3\text{COOD}$ ):  $\delta$  = 3.21 (t,  $^3J$  = 6 Hz, 2H, 5-H), 4.93 (t,  $^3J$  = 6 Hz, 2H, 6-H), 6.18 (s, 2H,  $\text{OCH}_2\text{O}$ ), 7.42 (d,  $^3J$  = 4 Hz, 4'-H), 7.09 (s, 1H, 4-H), 7.18 (t,  $^3J$  = 9 Hz, 2H, 3'-H, 5'-H), 7.03 (t,  $^3J$  = 9 Hz, 2H, 2'-H, 6'-H), 7.66 (d,  $^3J$  = 4 Hz, 1H, 12-H), 7.80 (s, 1H, 1-H), 7.82 (s, 1H, 11-H), 8.91 (s, 1H, 13-H), 10.00 (s, 1H, 8-H). –  $^{13}\text{C}$  NMR of **4a** x  $\text{CF}_3\text{COOD}$  (125 MHz,  $\text{DMSO}-d_6$  +  $\text{CF}_3\text{COOD}$ ):  $\delta$  = 26.3 (C5), 54.9 (C6), 102.1 ( $\text{OCH}_2\text{O}$ ), 105.6 (C1), 108.4 (C4), 117.4 (C4'), 118.7 (C12), 119.1 (C13b), 119.9 (C8a), 120.4 (C13), 123.5 (C3', C5'), 130.1 (C2', C6'), 131.0 (C4a), 132.1 (C11), 135.8 (C12a), 138.6 (C13a), 140.6 (C9), 145.9 (C8), 146.8 (C10), 147.7 (C2), 150.0 (C3), 156.9 (C1'). – MS (ESI<sup>+</sup>):  $m/z$  (%) = 384 (100)  $[\text{M}+\text{H}]^+$ . – El. Anal. for  $\text{C}_{24}\text{H}_{17}\text{NO}_4$ , calcd. (%): C 75.19, H 4.47, N 3.65, found (%): C 74.86, H 4.22, N 3.67.

*10-(4-Chlorophenoxy)-5,6-dihydro-[1,3]dioxolo[4,5-g]isoquinolino[3,2-a]isoquinolin-7-ium-9-olate (4b).*

According to GP 1 the reaction of **1b** (240 mg, 750  $\mu$ mol) with **3b** (469 mg, 3.00 mmol) gave product **4b** as red solid (53.0 mg, 127  $\mu$ mol, 17%); mp > 286 °C (dec.). –  $^1\text{H}$  NMR of **4b** (500 MHz,  $\text{CDCl}_3$ ):  $\delta$  = 3.15 (t,  $^3J$  = 7 Hz, 1H, 5-H), 4.59 (t,  $^3J$  = 7 Hz, 1H, 6-H), 6.09 (s, 1H,  $\text{OCH}_2\text{O}$ ), 6.72 (s,  $^3J$  = 7 Hz, 1H, 12-H), 6.81 (s, 1H, 4-H), 6.92 (d,  $^3J$  = 7, 2H, 2'-H, 6'-H), 7.12 (d,  $^3J$  = 7 Hz, 2H, 3'-H, 5'-H), 7.33 (s, 1H, 1-H), 7.57 (d,  $^3J$  = 7 Hz, 1H, 11-H), 7.86 (s, 1H, 13-H), 9.30 (s, 1 H, H8). –  $^{13}\text{C}$  NMR of **4b** (125 MHz,  $\text{CDCl}_3$ ):  $\delta$  = 28.2 (C5), 54.2 (C6), 102.2 ( $\text{OCH}_2\text{O}$ ), 105.0 (C1), 108.6 (C4), 117.9 (C2', C6'), 118.5 (C13), 121.4 (C13b), 126.6 (C4') 129.2 (C4a), 129.3 (C3', C5') 133.1 (C11), 135.9 (C13a), 136.5 (C12a), 144.7 (C10), 146.2 (C8), 148.4 (C2), 150.6 (C3), 157.3 (C1'), 165.8 (C9). – MS (ESI<sup>+</sup>):  $m/z$  (%) = 419 (100)  $[\text{M}+\text{H}]^+$  – EI. Anal. for  $\text{C}_{24}\text{H}_{16}\text{NO}_4\text{Cl} \times 2/3 \text{H}_2\text{O}$ , calcd. (%): C: 67.06; H: 4.06; N: 3.26; found (%): C: 66.76, H: 3.50, N: 3.26.

*10-(4-Bromophenoxy)-5,6-dihydro-[1,3]dioxolo[4,5-g]isoquinolino[3,2-a]isoquinolin-7-ium-9-olate (4c).*

According to GP 1 the reaction of **1b** (240 mg, 750  $\mu$ mol) with **3c** (602 mg, 3.00 mmol) gave product **4c** as red solid (65.0 mg, 141  $\mu$ mol, 19%); mp > 300 °C (dec.). –  $^1\text{H}$  NMR of **4c** x  $\text{CF}_3\text{COOD}$  (500 MHz,  $\text{DMSO}-d_6 + \text{CF}_3\text{COOD}$ ):  $\delta$  = 3.21 (t,  $^3J$  = 6 Hz, 2H, 5-H), 4.93 (t,  $^3J$  = 6 Hz, 2H, 6-H), 6.18 (s, 2H,  $\text{OCH}_2\text{O}$ ), 6.98 (d,  $^3J$  = 9 Hz, 2H, 2'-H, 6'-H), 7.09 (s, 1H, 4-H), 7.58 (d,  $^3J$  = 9 Hz, 2H, 3'-H, 5'-H), 7.67 (d,  $^3J$  = 9 Hz, 1H, 12-H), 7.82 (s, 1H, 1-H), 7.86 (d,  $^3J$  = 9 Hz, 1H, 11-H), 8.91 (s, 1H, 13-H), 9.99 (s, 1H, 9-H). –  $^{13}\text{C}$  NMR of **4c** x  $\text{CF}_3\text{COOD}$  (100 MHz,  $\text{DMSO}-d_6 + \text{CF}_3\text{COOD}$ ):  $\delta$  = 26.3 (C5), 54.9 (C6), 102.1 ( $\text{OCH}_2\text{O}$ ), 105.6 (C1), 108.4 (C4), 115.0 (C4'), 118.8 (C12), 119.2 (C8a), 119.4 (C2', C6'), 120.0 (C13), 120.3 (C13b), 131.0 (C4a), 132.3 (C11), 132.7 (C3', C5'), 136.1 (C13a), 138.8 (C12a), 140.0 (C9), 146.0 (C8), 147.0 (C10), 147.7 (C2), 150.1 (C3), 156.4 (C1'). – MS (ESI<sup>+</sup>):  $m/z$  (%) = 462 (100)  $[\text{M}+\text{H}]^+$ . – EI. Anal. for  $\text{C}_{24}\text{H}_{16}\text{BrNO}_4$ , calcd. (%): C 62.35, H 3.49, N 3.03, found. (%): C 61.92, H 3.23, N 3.07.

*10-(4-Methoxyphenoxy)-5,6-tetrahydro-[1,3]dioxolo[4,5-g]isoquinolino[3,2-a]isoquinolin-7-ium-9-olate (4d).*

According to GP 1 the reaction of **1b** (240 mg, 750  $\mu$ mol) with **3d** (455 mg, 3.00 mmol) gave product **4d** as red solid (54.5 mg, 132  $\mu$ mol, 18%); mp > 300 °C (dec.). –  $^1\text{H}$  NMR of **4d** x  $\text{CF}_3\text{COOD}$  (500 MHz,  $\text{DMSO-}d_6$  +  $\text{CF}_3\text{COOD}$ ):  $\delta$  = 3.21 (t,  $^3J$  = 6 Hz, 2H, 5-H), 3.76 (s, 3H, 4'-OCH<sub>3</sub>), 4.93 (t,  $^3J$  = 6 Hz, 2H, 6-H), 6.17 (s, 2H, OCH<sub>2</sub>O), 6.99 (d,  $^3J$  = 9 Hz, 2H, 2'-H, 6'-H), 7.04 (d,  $^3J$  = 9 Hz, 2H, 3'-H, 5'-H), 7.09 (s, 1H, 4-H), 7.64 (d,  $^3J$  = 4 Hz, 1H, 12-H), 7.72 (d,  $^3J$  = 4 Hz, 1H, 11-H), 7.82 (s, 1H, 1-H), 8.88 (s, 1H, 13-H), 9.99 (s, 1H, 8-H). –  $^{13}\text{C}$  NMR of **4d** x  $\text{CF}_3\text{COOD}$  (125 MHz,  $\text{DMSO-}d_6$  +  $\text{CF}_3\text{COOD}$ ):  $\delta$  = 26.3 (C5), 54.9 (C6), 55.5 (OCH<sub>3</sub>), 102.1 (OCH<sub>2</sub>O), 105.5 (C1), 108.4 (C4), 115.1 (C2', C6'), 118.5 (C12), 118.9 (C3', C5'), 119.5 (C13), 119.9 (C13b), 120.4 (C8a), 130.8 (C4a), 130.9 (C11), 135.1 (C12a), 138.2 (C13a), 142.1 (C9), 145.8 (C8), 145.9 (C10), 149.9 (C4'), 155.7 (C1'). – MS (ESI<sup>+</sup>):  $m/z$  (%) = 414 (100) [M+H]<sup>+</sup>. – El. Anal. for  $\text{C}_{25}\text{H}_{20}\text{NO}_5 \times 1.5\text{H}_2\text{O}$ , calcd. (%): C 68.17, H 5.03, N 3.18, found (%): C 68.44, H 4.57, N 3.31.

*10-(4-Nitrophenoxy)-5,6-dihydro-[1,3]dioxolo[4,5-g]isoquinolino[3,2-a]isoquinolin-7-ium-9-olate (4e).*

According to GP 1 the reaction of **1b** (150 mg, 467  $\mu$ mol) with **3e** (234 mg, 1.40 mmol) gave product **4e** as red solid (43.4 mg, 101  $\mu$ mol, 22%); mp > 300 °C (dec.). –  $^1\text{H}$  NMR of **4e** x  $\text{CF}_3\text{COOD}$  (500 MHz,  $\text{DMSO-}d_6$  +  $\text{CF}_3\text{COOD}$ ):  $\delta$  = 3.22 (t,  $^3J$  = 6 Hz, 2H, 5-H), 4.94 (t,  $^3J$  = 6 Hz, 2H, 6-H), 6.18 (s, 2H, OCH<sub>2</sub>O), 7.10 (s, 1H, 4-H), 7.15–7.17 (d,  $^3J$  = 9 Hz, 2H, 2'-H, 6'-H), 7.72 (d,  $^3J$  = 9 Hz, 1H, 12-H), 7.84 (s, 1H, 1-H), 7.97–7.99 (m, 1H, 11-H), 8.28–8.30 (m, 2H, 3'-H, 5'-H), 8.95 (s, 1H, 13-H), 10.03 (s, 1H, 8-H). –  $^{13}\text{C}$  NMR of **4e** x  $\text{CF}_3\text{COOD}$  (125 MHz,  $\text{DMSO-}d_6$  +  $\text{CF}_3\text{COOD}$ ):  $\delta$  = 26.4 (C5), 54.9 (C6), 102.2 (OCH<sub>2</sub>O), 105.7 (C1), 108.5 (C4), 2 x 116.9 (C2', C6'), 118.9 (C12), 119.5 (C8a), 120.0 (C13), 120.3 (C13b), 126.1 (C3', C5'), 131.2 (C4a), 133.2 (C11), 137.0 (C9), 138.5 (C12a), 139.3 (13aC), 142.6 (C1'), 147.8 (C2), 150.2 (C3), 158.1 (C10), 162.2 (C4'), 146.2 (C8). – MS (ESI<sup>+</sup>):  $m/z$  (%) = 464 (100) [M+2H<sub>2</sub>O]<sup>+</sup>. – El. Anal. for  $\text{C}_{25}\text{H}_{20}\text{NO}_5 \times 1.5\text{H}_2\text{O}$ , calcd. (%): C 63.72, H 4.16, N 6.19, found (%): C 63.39, H 3.57, N 6.01.

10-(4-(Ethoxycarbonyl)phenoxy)-5,6-dihydro-[1,3]dioxolo[4,5-g]isoquinolino[3,2-a]isoquinolin-7-ium-9-olate (**4f**).

According to GP 1 the reaction of **1b** (240 mg, 750  $\mu$ mol) with **3f** (579 mg, 3.00 mmol) gave product **4f** as red solid (54.1 mg, 119  $\mu$ mol, 16%); mp > 278° C (dec.). – <sup>1</sup>H NMR of **4f** x CF<sub>3</sub>COOD (500 MHz, DMSO-*d*<sub>6</sub> + CF<sub>3</sub>COOD):  $\delta$  = 1.31 (q, <sup>3</sup>*J* = 6 Hz, 3H CH<sub>3</sub>CH<sub>2</sub>O), 3.21 (t, <sup>3</sup>*J* = 6 Hz, 2H, 5-H), 4.31 (t, <sup>3</sup>*J* = 6 Hz, 2H CH<sub>3</sub>CH<sub>2</sub>O), 4.93 (t, <sup>3</sup>*J* = 6 Hz, 2H, 6-H), 6.18 (s, 1 H, OCH<sub>2</sub>O), 7.09 (s, 1H, 4-H), 7.09 (t, <sup>3</sup>*J* = 6 Hz, 2H, 2'-H, 6'-H), 7.69 (t, <sup>3</sup>*J* = 6 Hz, 1H, 12-H), 7.83 (s, 1H, 1-H), 7.91 (t, <sup>3</sup>*J* = 6 Hz, 11-H), 8.00 (t, <sup>3</sup>*J* = 6 Hz, 3'-H, 5'-H), 8.93 (s, 1H, 13-H), 10.01 (s, 1H, 8-H). – <sup>13</sup>C NMR of **4f** x CF<sub>3</sub>COOD (125 MHz, DMSO-*d*<sub>6</sub> + CF<sub>3</sub>COOD):  $\delta$  = 14.19 (CH<sub>3</sub>CH<sub>2</sub>O), 26.3 (C5), 54.9 (C6), 60.65 (CH<sub>3</sub>CH<sub>2</sub>O), 102.2 (OCH<sub>2</sub>O), 105.7 (C1), 108.5 (C4), 116.7 (C2', C6'), 118.9 (C12), 119.4 (C8a), 120.0 (C13), 120.3 (C13b), 124.6 (C4'), 131.1 (C4a), 133.0 (C11), 134.5 (C3', C5'), 136.6 (C9), 139.1 (C13a), 139.1 (C12a), 146.0 (C8), 147.4 (C10), 147.5 (C2), 150.1 (C3), 165.1 (C=O), 165.1 (C1'). – MS (ESI<sup>+</sup>): *m/z* (%) = 454 (100) [M]<sup>+</sup>. – EI. Anal. for C<sub>27</sub>H<sub>21</sub>NO<sub>6</sub> x 0.5 H<sub>2</sub>O, calcd. (%): C 69.82, H 4.77, N 3.02, found (%): C 69.39, H 4.10, N 2.98.

### General Procedure for the O-methylation of derivatives 5a–e (GP 2).

A mixture of the respective aryloxyisoquinolinium (36.2–67.5  $\mu$ mol) and K<sub>2</sub>CO<sub>3</sub> (1 molar eq.), and MeI (1.5 ml, 3.42 g, 24.1 mmol) in CH<sub>2</sub>Cl<sub>2</sub> (3 ml) was stirred for 2 d at r.t. The mixture was diluted with CH<sub>2</sub>Cl<sub>2</sub> (30 ml) and filtered, and the solvent was removed by distillation. The residue was dissolved in MeOH (5 ml) and diluted with water (5 ml). A solution of aq. NaBF<sub>4</sub> (sat., 1.0 ml) was added. The yellow precipitate was filtered off and redissolved in CH<sub>2</sub>Cl<sub>2</sub> (30 ml). The suspension was filtered and the solvent was removed to give the essentially pure product. Analytical pure samples were obtained by recrystallization from MeOH/EtOAc.

*9-Methoxy-10-phenoxy-5,6-dihydro-[1,3]dioxolo[4,5-g]isoquinolino[3,2-a]isoquinolin-7-ium tetrafluoroborate (5a).*

According to GP 2 the reaction of **4a** (28.1 mg, 73.5  $\mu\text{mol}$ ), with MeI (1.5 ml, 3.42 g, 24.1 mmol) and  $\text{K}_2\text{CO}_3$  (10.2 mg, 73.5  $\mu\text{mol}$ ) gave product **5a** as yellow solid (27.2 mg, 56.2  $\mu\text{mol}$ , 76%); mp > 288  $^\circ\text{C}$  (dec.).  $^1\text{H}$  NMR (500 MHz,  $\text{DMSO}-d_6$ ):  $\delta$  = 3.23 (t,  $^3J$  = 6 Hz, 2 H, 5-H), 4.15 (s, 3H,  $\text{OCH}_3$ ), 4.96 (t,  $^3J$  = 6 Hz, 2H, 6-H), 6.19 (s, 2H,  $\text{OCH}_2\text{O}$ ), 7.42 (d,  $^3J$  = 4 Hz, 1H, 4'-H), 7.09 (d,  $^3J$  = 8 Hz, 2H, 2'-H, 6'-H), 7.11 (s, 1H, 4-H), 7.21 (t,  $^3J$  = 8 Hz, 1H, 4'-H), 7.45 (d,  $^3J$  = 8 Hz, 2H, 3'-H, 5'-H), 7.84 (d,  $^3J$  = 4 Hz, 1H, 1-H), 7.90 (d,  $^3J$  = 9 Hz, 1H, 11-H), 7.95 (s,  $^3J$  = 9 Hz, 1H, 12-H), 9.00 (s, 1H, 13-H), 9.98 (s, 1H, 8-H).  $^{13}\text{C}$  NMR (125 MHz,  $\text{DMSO}-d_6$ ):  $\delta$  = 26.3 (C5), 55.2 (C6), 62.3 ( $\text{CH}_3$ ), 102.2 ( $\text{OCH}_2\text{O}$ ), 105.7 (C1), 108.5 (C4), 117.4 (C2', C6'), 120.2 (C13b), 120.3 (C13), 121.9 (C8a), 123.6 (C12), 123.9 (C4'), 130.3 (C3', C5'), 131.2 (C4a), 132.9 (C11), 136.1 (C12a), 139.3 (C13a), 145.1 (C10), 145.8 (C8), 147.2 (C9), 147.8 (C2), 150.2 (C3), 156.5 (C1'). – MS (ESI<sup>+</sup>):  $m/z$  (%) = 398 (100)  $[\text{M}-\text{BF}_4]^+$ . – El. Anal. for  $\text{C}_{25}\text{H}_{20}\text{NO}_4\text{BF}_4$ , calcd. (%): C 61.88, H 4.15, N 2.89, found (%): C 61.98, H 3.86, N 2.82.

*9-Methoxy-10-(4-chlorophenoxy)-5,6-dihydro-[1,3]dioxolo[4,5-g]isoquinolino[3,2-a]isoquinolin-7-ium tetrafluoroborate (5b).*

According to GP 2 the reaction of **4b** (28.2 mg, 67.5  $\mu\text{mol}$ ), with MeI (1.5 ml, 3.42 g, 24.1 mmol) and  $\text{K}_2\text{CO}_3$  (9.33 mg, 67.5 mmol) gave product **5b** as yellow solid (22.4 mg, 43.1  $\mu\text{mol}$ , 64%); mp > 268  $^\circ\text{C}$  (dec.).  $^1\text{H}$  NMR (500 MHz,  $\text{DMSO}-d_6$ ):  $\delta$  = 3.21 (t,  $^3J$  = 6 Hz, 2H, 5-H), 4.13 (s, 3H,  $\text{CH}_3$ ), 4.96 (t,  $^3J$  = 6 Hz, 2H, 6-H), 6.19 (s, 2H,  $\text{OCH}_2\text{O}$ ), 7.11 (s, 1H, 4-H), 7.13 (d,  $^3J$  = 9 Hz, 2H, 2'-H, 6'-H), 7.50 (d,  $^3J$  = 9 Hz, 2H, 3'-H, 5'-H), 7.85 (s, 1H, 1-H), 7.94 (d,  $^3J$  = 9 Hz, 1H, 11-H), 7.96 (d,  $^3J$  = 9 Hz, 1H, 12-H), 9.01 (s, 1H, 13-H), 9.98 (s, 1H, 8-H).  $^{13}\text{C}$  NMR (125 MHz,  $\text{DMSO}-d_6$ ):  $\delta$  = 26.3 (C5), 55.2 (C6), 62.4 ( $\text{CH}_3$ ), 102.2 ( $\text{OCH}_2\text{O}$ ), 105.7 (C1), 108.5 (C4), 119.1 (C2', C6'), 120.2 (C13b), 120.3 (C13), 121.9 (C8a), 123.8 (C12), 127.8 (C4'), 130.1 (C3', C5'), 131.2 (C4a), 132.9 (C11), 136.4 (C12a), 139.5 (C13a), 144.8 (C10), 145.9 (C8), 147.4 (C9), 147.8 (C2), 150.3 (C3), 155.4

(C1'). – MS (ESI<sup>+</sup>):  $m/z$  (%) = 432 (100) [M-BF<sub>4</sub>]<sup>+</sup>. – El. Anal. for C<sub>25</sub>H<sub>19</sub>NO<sub>4</sub>BClF<sub>4</sub>, calcd. (%): C 57.78, H 3.69, N 2.70, found (%): C 57.84, H 3.37, N 2.72.

*9-Methoxy-10-(4-bromophenoxy)-5,6-dihydro-[1,3]dioxolo[4,5-g]isoquinolino[3,2-a]isoquinolin-7-ium tetrafluoroborate (5c).*

According to GP 2 the reaction of **4c** (19.2 mg, 41.6 μmol) with MeI (1.5 ml, 3.42 g, 24.1 mmol) and K<sub>2</sub>CO<sub>3</sub> (5.75 mg, 41.6 μmol) gave product **5c** as yellow solid (17.6 mg, 31.2 μmol, 75%); mp > 264 °C (dec.). – <sup>1</sup>H NMR (500 MHz, DMSO-*d*<sub>6</sub>): δ = 3.22 (t, <sup>3</sup>J = 6 Hz, 2H, 5-H), 4.13 (s, 3H, CH<sub>3</sub>), 4.96 (t, <sup>3</sup>J = 6 Hz, 2H, 6-H), 6.19 (s, 2H, OCH<sub>2</sub>O), 7.06 (d, <sup>3</sup>J = 9 Hz, 2H, 2'-H, 6'-H), 7.11 (s, 1H, 4-H), 7.62 (d, <sup>3</sup>J = 9 Hz, 2H, 3'-H, 5'-H), 7.83 (s, 1H, 1-H), 7.94 (d, <sup>3</sup>J = 9 Hz, 1H, 12-H), 7.96 (d, <sup>3</sup>J = 9 Hz, 1H, 11-H), 9.01 (s, 1H, 13-H), 9.98 (s, 1H, 8-H). – <sup>13</sup>C NMR (125 MHz, DMSO-*d*<sub>6</sub>): δ = 26.3 (C5), 55.2 (C6), 62.4 (CH<sub>3</sub>), 102.2 (OCH<sub>2</sub>O), 105.7 (C1), 108.5 (C4), 115.7 (C4') 119.5 (C2', C6'), 120.2 (C13b), 120.3 (C13), 121.9 (C8a), 123.7 (C12), 131.2 (C4a), 133.0 (C11), 133.0 (C3', C5'), 136.4 (C12a), 139.5 (C13a), 144.6 (C10), 145.9 (C8), 147.4 (C9), 147.8 (C2), 150.3 (C3), 155.9 (C1'). – MS (ESI<sup>+</sup>):  $m/z$  (%) = 476 (100) [M-BF<sub>4</sub>]<sup>+</sup>. – El. Anal. for C<sub>25</sub>H<sub>19</sub>BrNO<sub>4</sub>BF<sub>4</sub>, calcd. (%): C 52.39, H 3.52, N 2.44, found. (%): C 52.33, H 2.99, N 2.31.

*9-Methoxy-10-(4-Methoxyphenoxy)-5,6-dihydro-[1,3]dioxolo[4,5-g]isoquinolino[3,2-a]isoquinolin-7-ium tetrafluoroborate (5d).*

According to GP 2 the reaction of **4d** (15.0 mg, 36.2 μmol) with MeI (1.5 ml, 3.42 g, 24.1 mmol) and K<sub>2</sub>CO<sub>3</sub> (5.00 mg, 36.2 μmol) gave product **5d** as yellow solid (7.45 mg, 14.5 μmol, 40%); mp > 260 °C (dec.). – <sup>1</sup>H NMR (500 MHz, DMSO-*d*<sub>6</sub>): δ = 3.22 (t, <sup>3</sup>J = 6 Hz, 2H, 5-H), 3.77 (s, 3H, 4-OCH<sub>3</sub>), 4.17 (s, 3H, 9-OCH<sub>3</sub>), 4.95 (t, <sup>3</sup>J = 6 Hz, 2H, 6-H), 6.18 (s, 2H, OCH<sub>2</sub>O), 7.01–7.03 (m, 2H, 2'-H, 6'-H), 7.08–7.10 (m, 2H, 3'-H, 5'-H), 7.11 (m, 1H, 4-H), 7.80–7.83 (m, 2H, 1-H, 11-H), 7.92 (d, <sup>3</sup>J = 9 Hz, 1H, 12-H), 8.97 (s, 1H, 13-H), 9.96 (s, 1H, 8-H). – <sup>13</sup>C NMR (125 MHz, DMSO-*d*<sub>6</sub>): δ = 26.3 (C5), 55.2 (C6), 55.6 (4'-OCH<sub>3</sub>), 62.3 (9-OCH<sub>3</sub>), 102.2 (OCH<sub>2</sub>O), 105.7 (C1), 108.5 (C4), 115.4 (C2', C6'), 119.4 (C3', C5'), 120.0 (C13), 120.3 (C13b), 121.9 (C12a), 123.5 (C12), 131.1 (C4a), 131.7



(C11), 135.5 (C9), 139.0 (C13a), 145.7 (C8), 146.3 (C2), 146.6 (C8a), 147.8 (C10), 149.6 (C1'), 150.2 (C3), 155.9 (C4'). – MS (ESI<sup>+</sup>):  $m/z$  (%) = 429 (100) [M-BF<sub>4</sub>]<sup>+</sup>. – EI. Anal. for C<sub>26</sub>H<sub>22</sub>BF<sub>4</sub>NO<sub>5</sub>, calcd. (%): C 60.61, H 4.30, N 2.72, found (%): C 60.60, H 4.00, N 2.74.

*9-Methoxy-10-(4-nitrophenoxy)-5,6-dihydro-[1,3]dioxolo[4,5-g]isoquinolino[3,2-a]isoquinolin-7-ium tetrafluoroborate (5e).*

According to GP 2 the reaction of **4e** (20.0 mg, 46.7 μmol) with MeI (1.5 ml, 3.42 g, 24.1 mmol) and K<sub>2</sub>CO<sub>3</sub> (6.45 mg, 46.7 μmol) gave product **5e** as yellow solid (19.1 mg, 36.0 μmol, 77%); mp > 269 °C (dec.). – <sup>1</sup>H NMR (500 MHz, DMSO-*d*<sub>6</sub>): δ = 3.22 (t, <sup>3</sup>J = 6 Hz, 2H, 5-H), 4.10 (s, 3H, CH<sub>3</sub>), 4.94 (t, <sup>3</sup>J = 6 Hz, 2H, 6-H), 6.20 (s, 2H, OCH<sub>2</sub>O), 7.12 (s, 1H, 4-H), 7.27 (d, <sup>3</sup>J = 9 Hz, 2H, 2'-H, 6'-H), 7.85 (s, 1H, 1-H), 8.00 (d, <sup>3</sup>J = 9 Hz, 1H, 12-H), 8.08 (d, <sup>3</sup>J = 9 Hz, 1H, 11-H), 8.32 (d, <sup>3</sup>J = 9 Hz, 2H, 3'-H, 5'-H), 9.05 (s, 1H, 13-H), 10.02 (s, 1H, 8-H). – <sup>13</sup>C NMR (125 MHz, DMSO-*d*<sub>6</sub>): δ = 26.2 (C5), 55.2 (C6), 62.6 (CH<sub>3</sub>), 102.3 (OCH<sub>2</sub>O), 105.8 (C1), 108.5 (C4), 117.2 (C2', C6'), 120.1 (C13b), 120.4 (C13), 122.0 (C8a), 123.9 (C12), 126.4 (C3', C5'), 131.4 (C4a), 133.6 (C11), 137.2 (C12a), 139.9 (C13a), 143.0 (C4'), 143.3 (C10), 146.1 (C8), 147.8 (C2), 148.1 (C9), 150.4 (C3), 161.7 (C1'). – MS (ESI<sup>+</sup>):  $m/z$  (%) = 443 (100) [M-BF<sub>4</sub>]<sup>+</sup>. – EI. Anal. for C<sub>25</sub>H<sub>19</sub>BF<sub>4</sub>N<sub>2</sub>O<sub>6</sub>, calcd. (%): C 56.63, H 3.61, N 5.28, found (%): C 56.26, H 3.23, N 5.20.

**Optimization of reaction parameters for the Chan-Evans-Lam coupling of berberrubine.**

**Table S1.** Optimization of reaction parameters for the synthesis of derivative **4a**.

| Entry <sup>a</sup> | Boronic acid        | Solvent                         | Temperature | Base             | Yield |
|--------------------|---------------------|---------------------------------|-------------|------------------|-------|
| 1                  | <b>3a</b>           | CH <sub>2</sub> Cl <sub>2</sub> | rt          | NEt <sub>3</sub> | 5%    |
| 2                  | NaPhBF <sub>3</sub> | CH <sub>2</sub> Cl <sub>2</sub> | rt          | NEt <sub>3</sub> | <3%   |
| 3                  | <b>3a</b>           | MeOH                            | 40 °C       | NEt <sub>3</sub> | <3%   |
| 4                  | <b>3a</b>           | MeOH                            | 40 °C       | NEt <sub>3</sub> | <3%   |
| 5                  | <b>3a</b>           | DMF                             | rt          | NEt <sub>3</sub> | 26%   |
| 6                  | <b>3a</b>           | DMF                             | 40 °C       | NEt <sub>3</sub> | 19%   |
| 7                  | <b>3a</b>           | DMF                             | rt          | 2,2'-Bipyridine  | <3%   |
| 8                  | <b>3a</b>           | DMF                             | rt          | Phenanthroline   | <3%   |
| 9                  | <b>3a</b>           | DMF                             | rt          | DMAP             | <3%   |

<sup>a</sup> All reactions were performed with berberrubine (**1b**, 1.00 mmol), Cu(OAc)<sub>2</sub> (1.00 mmol), 4 molar equiv base and molecular sieves (4 Å) in 5 mL of the corresponding solvent. The reaction was stopped when TLC analysis indicated complete consumption of **1b**.

## 2. Photophysical properties

Solutions were prepared from stock solutions of the derivatives **5a–e** in MeOH ( $c = 1.0$  mM). Aliquots of the stock solution were thoroughly evaporated under a stream of nitrogen, and the residue was redissolved in the respective solvent or solvent mixture.

**Table S2:** Absorption and emission properties of derivatives **5b**, **5c** and **5e** in different solvents.

| Compound  | Solvent           | $\lambda_{\text{abs}}^{\text{a}}$ / nm | $\lg \epsilon^{\text{b}}$ | $\lambda_{\text{fl}}^{\text{c}}$ / nm | $\Phi_{\text{fl}}^{\text{d}}$ |
|-----------|-------------------|----------------------------------------|---------------------------|---------------------------------------|-------------------------------|
| <b>5b</b> | CHCl <sub>3</sub> | 420                                    | 3.88                      | 532                                   | 0.03                          |
|           | EtOH              | 416                                    | 3.87                      | 561                                   | <0.01                         |
|           | MeOH              | 413                                    | 3.88                      | 576                                   | <0.01                         |
|           | DMSO              | 410                                    | 3.83                      | e                                     | e                             |
|           | Buffer            | 410                                    | 3.81                      | e                                     | e                             |
| <b>5c</b> | CHCl <sub>3</sub> | 421                                    | 3.85                      | 531                                   | 0.03                          |
|           | EtOH              | 415                                    | 3.85                      | 559                                   | <0.01                         |
|           | MeOH              | 414                                    | 3.87                      | 568                                   | <0.01                         |
|           | DMSO              | 410                                    | 3.82                      | e                                     | e                             |
|           | Buffer            | 410                                    | 3.64                      | e                                     | e                             |
| <b>5e</b> | MeOH              | 408                                    | 3.76                      | e                                     | e                             |
|           | DMSO              | 405                                    | 3.79                      | e                                     | e                             |
|           | Buffer            | 403                                    | 3.78                      | e                                     | e                             |

<sup>a</sup> Long-wavelength absorption maximum;  $c_{\text{L}} = 20$   $\mu\text{M}$ . <sup>b</sup>  $\epsilon$  = Molar extinction coeff. in  $\text{cm}^{-1} \text{M}^{-1}$ . <sup>c</sup> Fluorescence emission maximum;  $\lambda_{\text{ex}} = 415$  nm. <sup>d</sup> Fluorescence quantum yield relative to coumarin 153 in EtOH ( $\Phi_{\text{fl}} = 0.544$ ) [1]. <sup>e</sup> Fluorescence quantum yield too low to be determined.

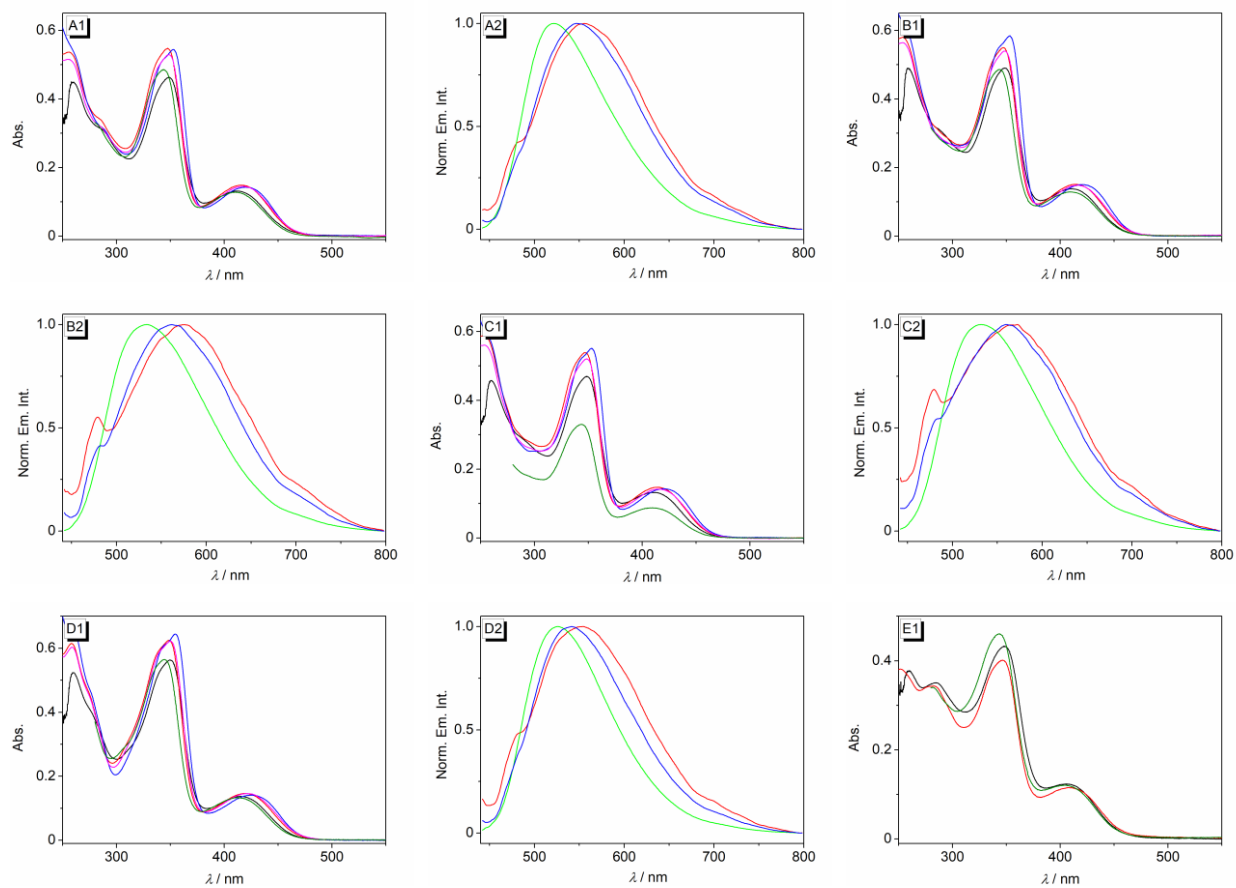

**Figure S1.** Absorption (1) and emission spectra (2) of **5a** (A), **5b** (B), **5c** (C), **5d** (D) and **5e** (E) ( $c = 20 \mu\text{M}$ ) in different solvents (red: MeOH, black: DMSO, green: aq. buffer, magenta: EtOH, blue:  $\text{CHCl}_3$ ; buffer: 16 mM BPE buffer solution at pH 7,  $\lambda_{\text{ex}} = 430 \text{ nm}$ ).

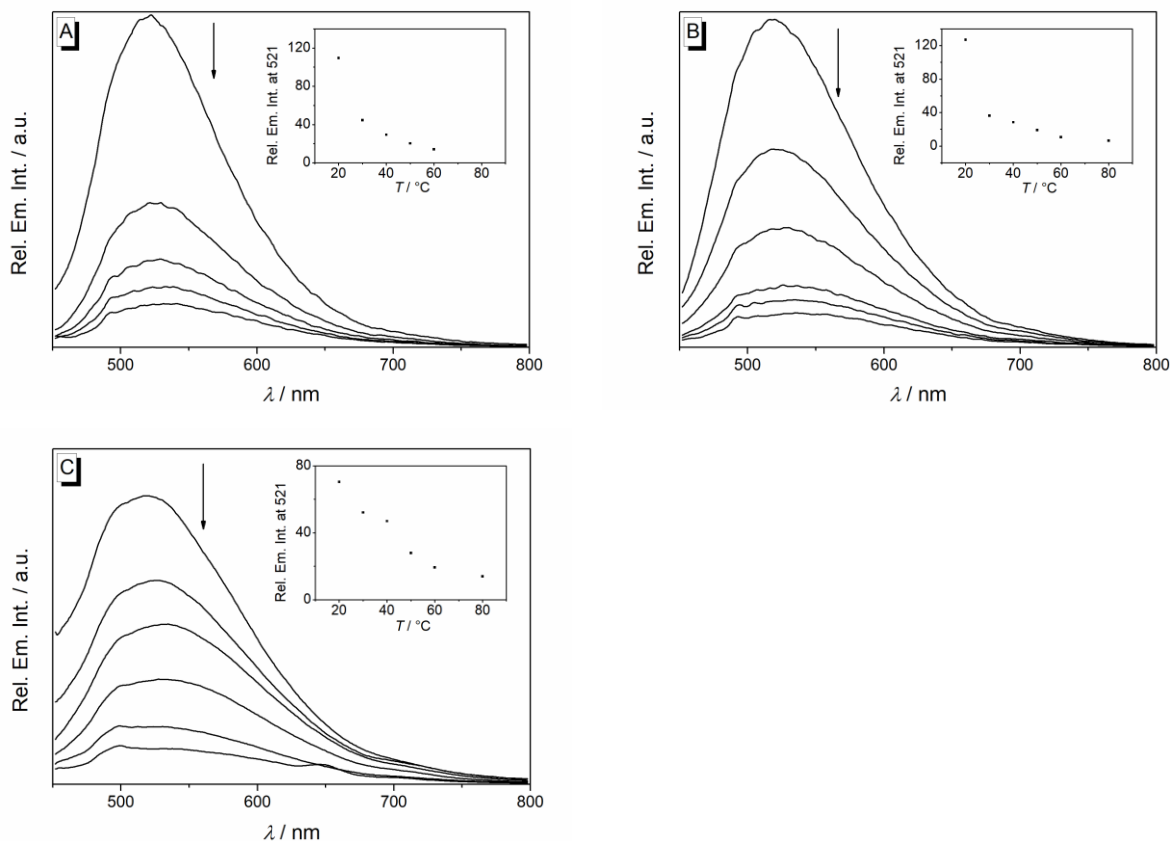

**Figure S2.** Emission spectra of derivatives **5b** (A), **5c** (B) and **5e** (C) ( $c = 10 \mu\text{M}$ , with 0.25% v/v DMSO) in glycerol;  $\lambda_{\text{ex}} = 430 \text{ nm}$ . The arrows indicate the changes of the emission intensity with increasing temperature. Inset: Plot of the relative emission intensity *versus* the temperature of the solution.

### 3. Determination of the fluorescence quantum yields

Solutions of **5a–e** were prepared as described above from stock solutions in MeOH ( $c = 1.0 \text{ mM}$ ). The relative fluorescence quantum yields were determined under identical conditions (detection wavelength, excitation wavelength, detector voltage, slit bandwidths, collection rate). excitation and emission slits were adjusted to 5 nm, and the excitation wavelengths were fixed to 340 nm The quantum yield  $\Phi_{\text{fl}}$  was determined according to equation 1. The estimated error is ca. 10% of the given values.

$$\Phi_{\text{fl}, X} = \frac{F_X A_S}{F_S A_X} \cdot \frac{n_X^2}{n_S^2} \cdot \Phi_{\text{fl}, S} \quad (\text{eq. 1})$$

The indices X and S indicate the analyte (X) and standard (S, coumarin 153 in ethanol,  $\Phi_{fl} = 0.544$  [1]) solution.

$\Phi_{fl}$  = Emission quantum yield.

$F$  = Integral of the emission curve.

$A$  = Absorbance at the excitation wavelength.

$n$  = Refractive index.

#### **4. Photometric and fluorimetric DNA titrations**

Photometric and fluorimetric titrations with ct DNA and oligonucleotides **22AG** were performed according to published protocols [2]. All titrations were performed with 5% v/v DMSO to ensure a sufficient solubility of the ligand.

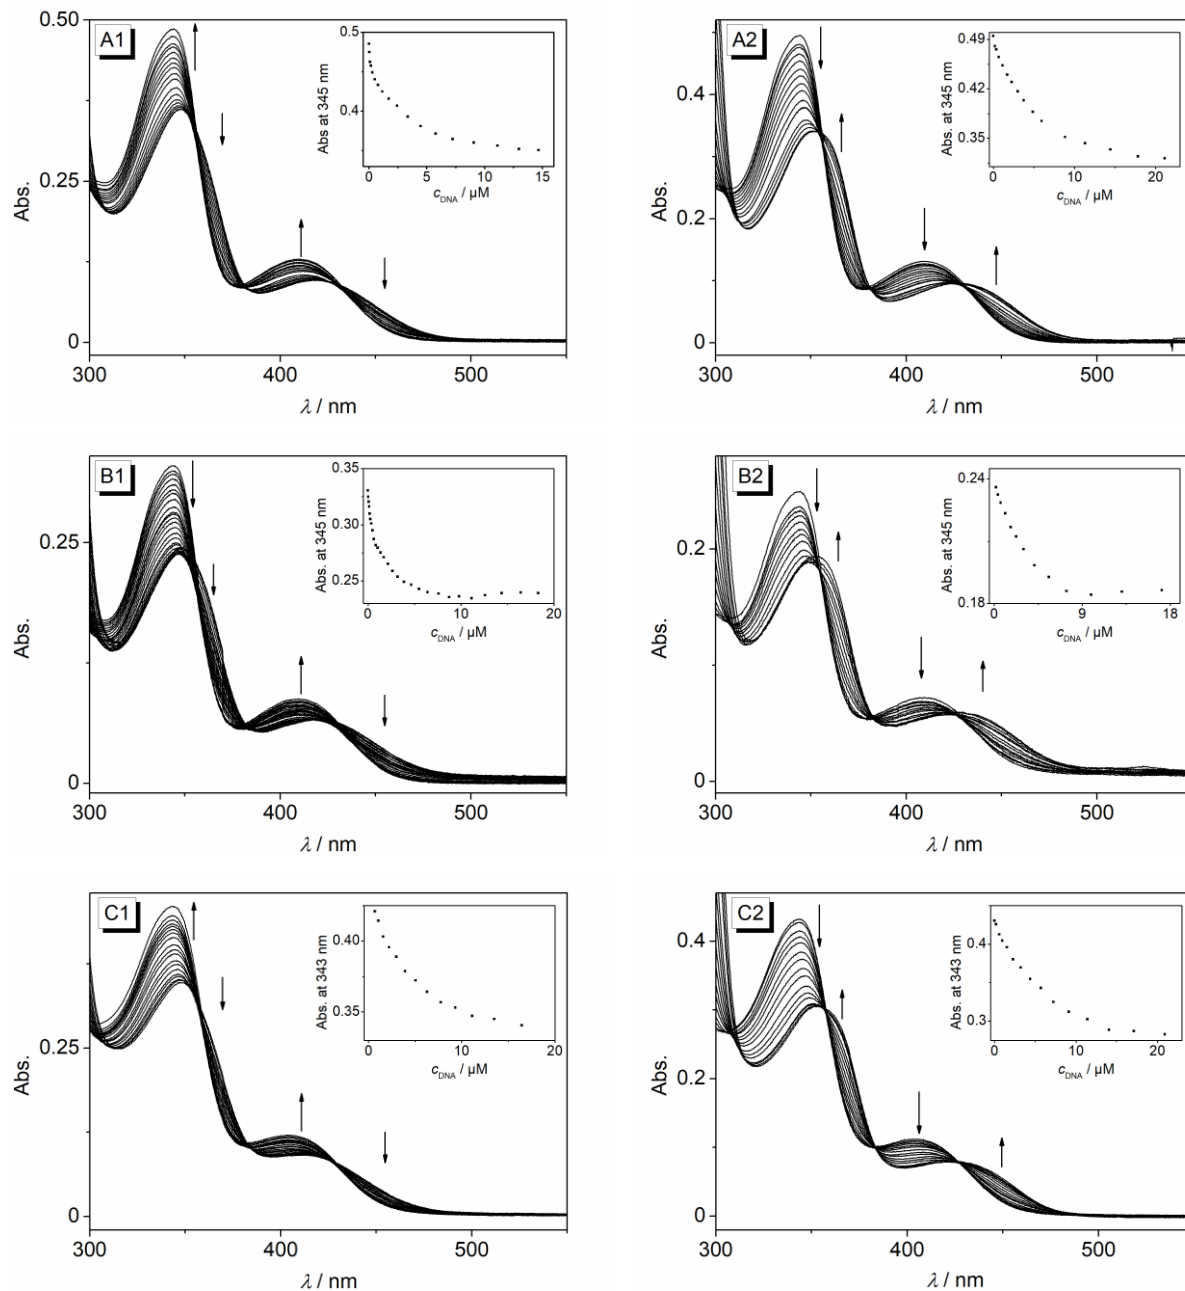

**Figure S3.** Photometric titration of **5b** (A), **5c** (B) and **5e** (C) ( $c_{Ligand} = 20 \mu M$ ) with ct DNA (1) in BPE buffer ( $c_{Na^+} = 16 \text{ mM}$ , pH 7.0, with 5% v/v DMSO) and with **22AG** (2) in K-phosphate buffer ( $c_{K^+} = 110 \text{ mM}$ , pH 7.0, with 5% v/v DMSO). The arrows indicate the changes of the absorption bands upon addition of DNA. Inset: Plot of the ligand absorption versus  $c_{DNA}$  (in base pairs).

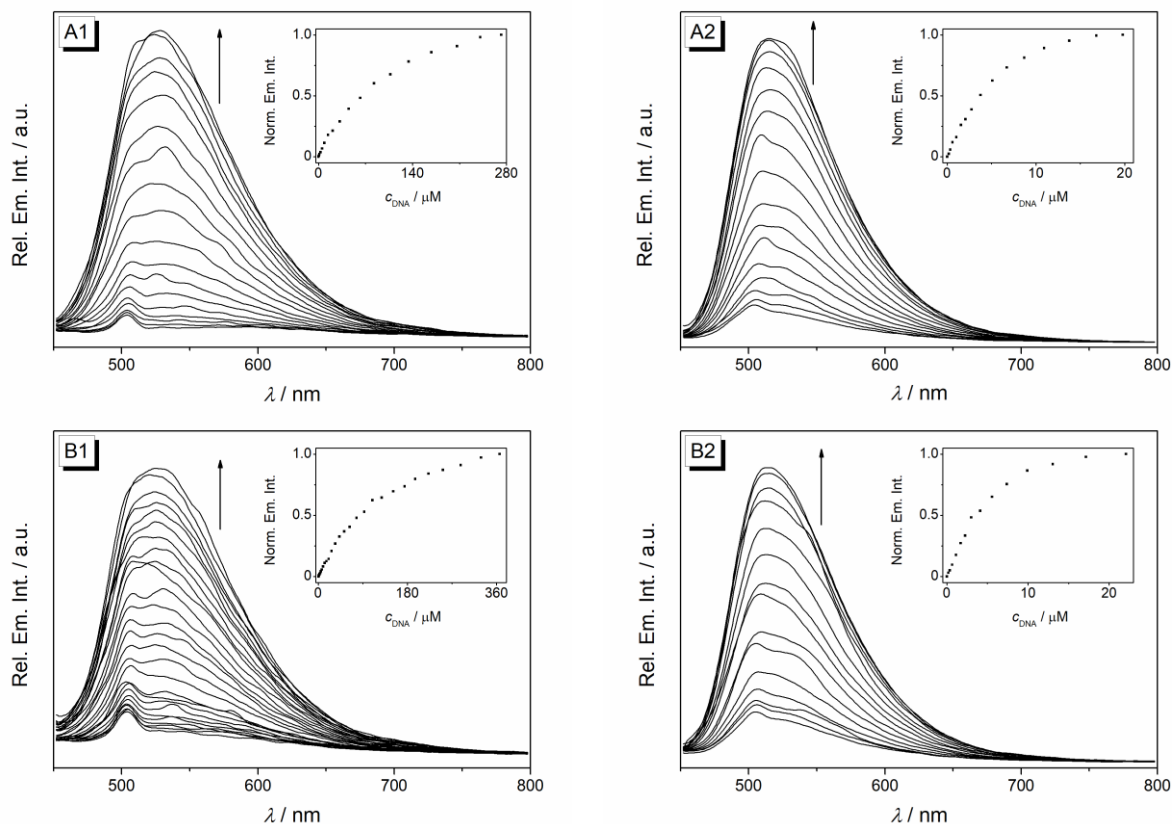

**Figure S4.** Fluorimetric titration of **5c** (A) and **5d** (B,  $c_{\text{Ligand}} = 20 \mu\text{M}$ ) with ct DNA (1) in BPE buffer ( $c_{\text{Na}^+} = 16 \text{ mM}$ , pH 7.0, with 5% v/v DMSO) and with **22AG** (2) in K-phosphate buffer ( $c_{\text{K}^+} = 110 \text{ mM}$ , pH 7.0, with 5% v/v DMSO);  $\lambda_{\text{ex}} = 430 \text{ nm}$ . The arrows indicate the changes of the emission bands upon addition of DNA. Inset: Plot of the relative fluorescence intensity versus  $c_{\text{DNA}}$  (in base pairs).

The binding constants,  $K_b$ , were determined from binding isotherms of the photometric titration spectra (Figure S5) and fitting of the experimental data to the theoretical model according to equation 2 [3].

$$\frac{I}{I_0} = 1 + \frac{Q-1}{2} \left( A + xn + 1 - \sqrt{(Q + xn + 1)^2 - 4xn} \right) \quad (\text{eq. 2})$$

$Q = I / I_0$  = Minimal absorbance in the presence of excess ligand

$n$  = Number of independent binding sites per DNA

$A = 1 / (K_b \times c_{\text{Ligand}})$

$X = c_{\text{DNA}} / c_{\text{Ligand}}$  = Titration variable Ligand



Standard derivations (SD) of  $K_b$  values were calculated according to equation 3.

$$SD(K_b) = \{ (SD \text{ of } A / A) / A \} / c_{\text{Ligand}} \quad (\text{eq. 3})$$

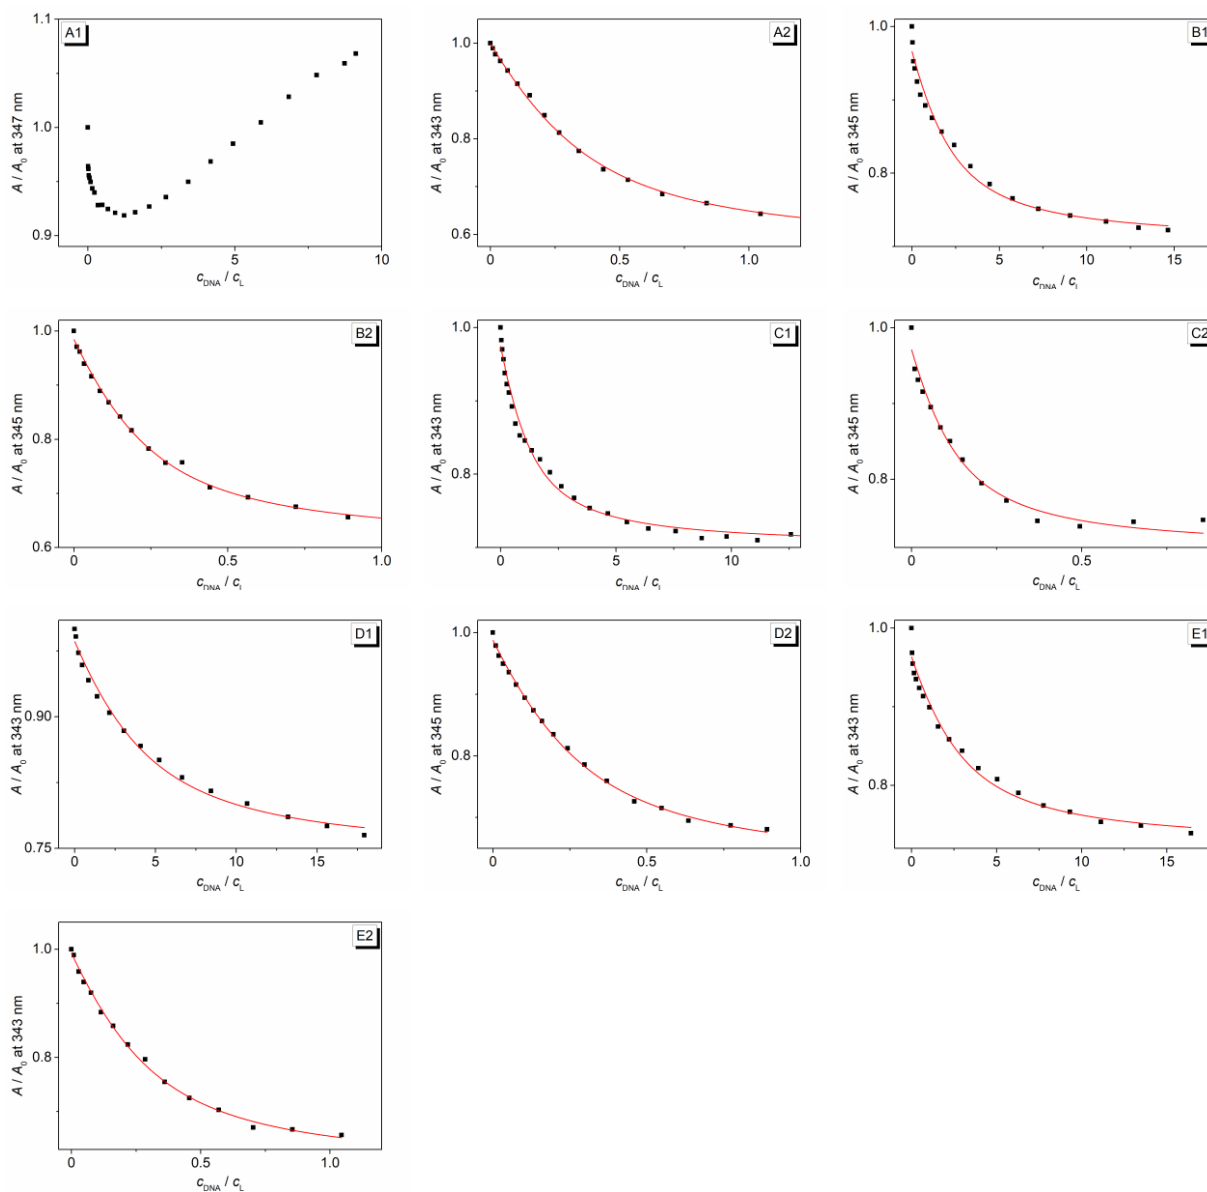

**Figure S5.** Fitting curves of binding isotherms resulting from spectrophotometric titrations of **5a** (A), **5b** (B), **5c** (C), **5d** (D) and **5e** (E) with ct DNA (1) and with **22AG** (2) for the determination of binding constants ( $K_b$ ). Red lines represent the best fits of the experimental data to the theoretical model.

## 5. CD- and LD-spectroscopic analysis

CD and LD spectra were recorded in BPE buffer solution with ct DNA ( $c_{\text{DNA}} = 20.0 \mu\text{M}$ , 5% v/v DMSO) and in K-phosphate buffer solution with **22AG** ( $c_{\text{DNA}} = 20.0 \mu\text{M}$ , 5% v/v DMSO) at different ligand-DNA ratios ( $LDR$ ). Measurements with ct DNA were performed at  $LDR = 0, 0.1, 0.2, 0.5, 1.0$ . CD signals were recorded with band width of 1 nm, recording speed of 1 nm/s and time per data point of 0.5 seconds.

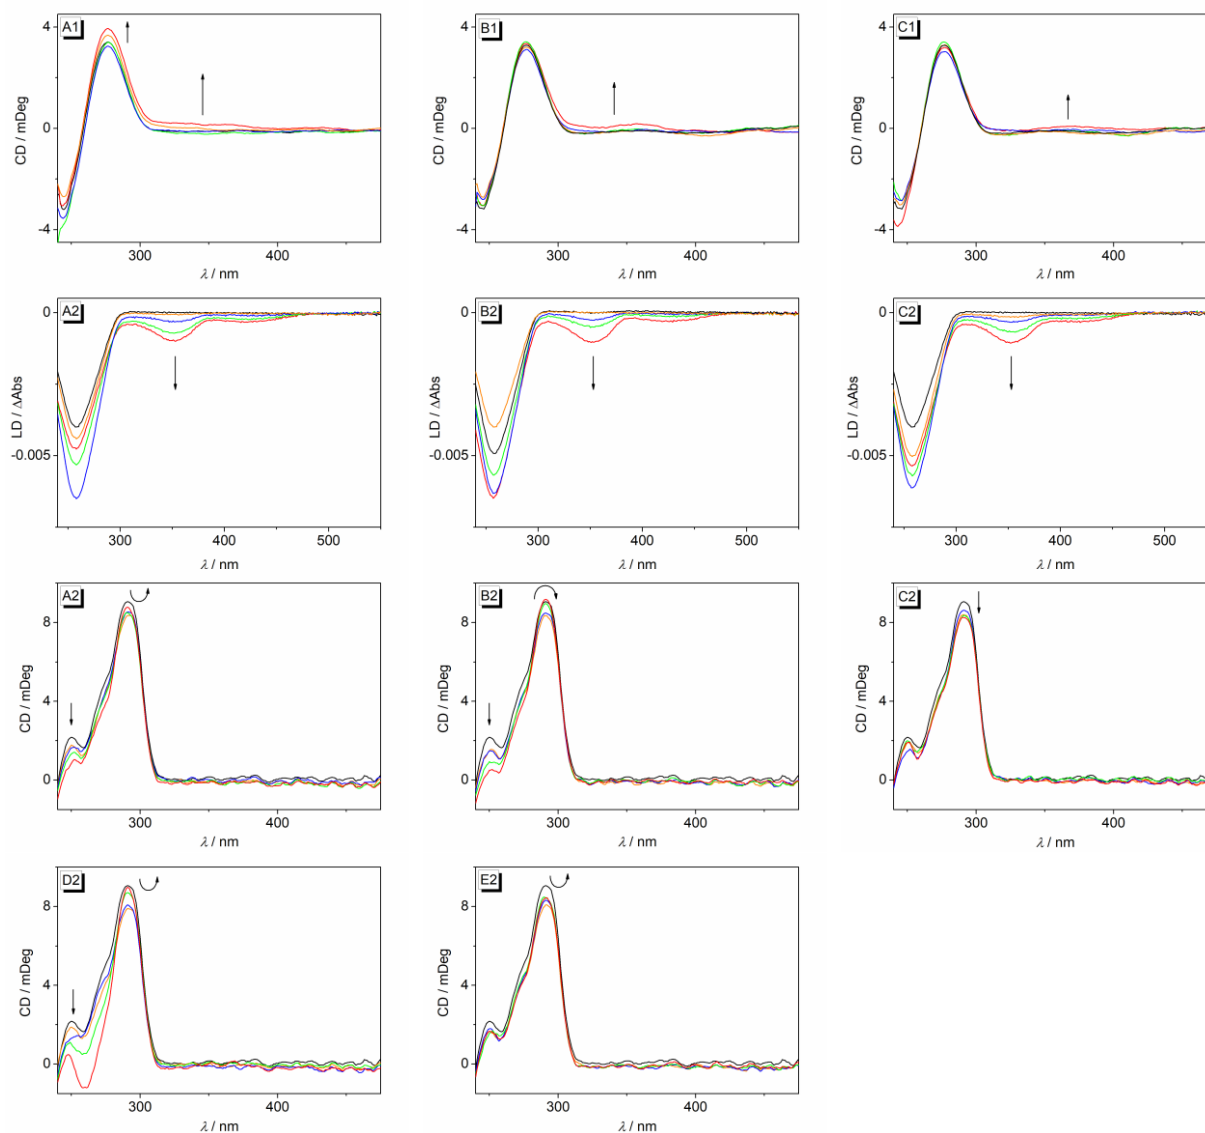

**Figure S6.** CD (1) and LD spectra (2) of ct DNA ( $c = 20 \mu\text{M}$ ) in the absence and presence of **5a** (A), **5b** (B), **5c** (C), **5d** (D) and **5e** (E) in BPE buffer solution (10 mM, pH 7.0; with 5% v/v DMSO). CD spectra of **22AG** (3,  $c = 20 \mu\text{M}$ ) in the absence and presence of **5a–e** in K-phosphate buffer ( $c_{\text{K}^+} = 110 \text{ mM}$ , pH 7.0, with 5% v/v DMSO) [ $LDR = 0$  (black), 0.05 (orange), 0.2 (blue), 0.5 (green), 1.0 (red)]. The arrows indicate the changes of absorption on addition of DNA.

## 6. Thermal denaturation experiments

The stock solutions of the oligonucleotide **F21T**, **Fa2T**, **FmycT** and **FkitT** ( $c = 50 \mu\text{M}$ ) and the ligand ( $c = 5 \mu\text{M}$ ) were prepared in cacodylate buffer. The solution with the ligand contained 1% v/v DMSO. The samples were mixed according to Table S2. Melting temperatures,  $\Delta T_m$ , were determined from the maximum of the first derivative of the melting curves. The determined  $T_m$  values before addition of ligand resembled the ones reported in literature [4–6].

**Table S3.** Composition of the samples for Fluorimetric DNA Denaturation Experiments with **F21T**, **Fa2T**, **FmycT** and **FkitT**.

| Sample <sup>a</sup> | $c_{\text{Ligand}} / \mu\text{M}$ | $V_{\text{Ligand}} / \mu\text{L}^b$ | $V_{\text{DMSO}} / \mu\text{L}$ | $V_{\text{Puffer}} / \mu\text{L}$ |
|---------------------|-----------------------------------|-------------------------------------|---------------------------------|-----------------------------------|
| 1                   | 0                                 | 0                                   | 10.0                            | 996                               |
| 2                   | 0.25                              | 50                                  | 9.50                            | 971                               |
| 3                   | 0.50                              | 100                                 | 9.00                            | 946                               |
| 4                   | 1.00                              | 200                                 | 8.00                            | 896                               |

<sup>a</sup>  $V_{\text{DNA}} = 4 \mu\text{L}$   $c_{\text{DNA}} = 0.2 \mu\text{M}$ . <sup>b</sup>  $c_{\text{DMSO}} = 1 \text{ vol}\%$   $c_{\text{Ligand}} = 10 \mu\text{M}$ .

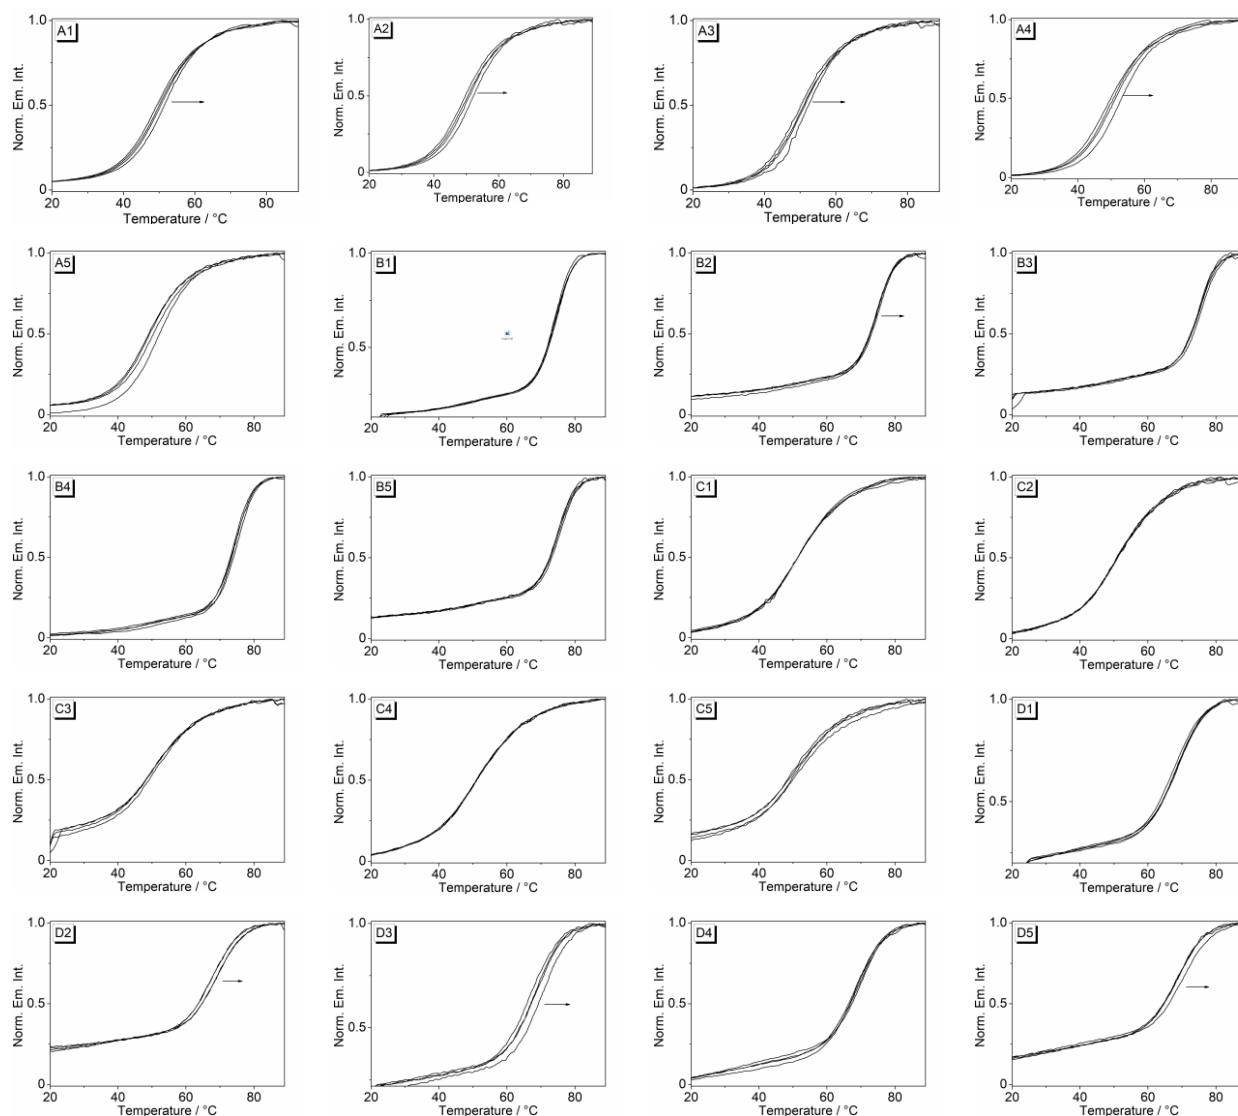

**Figure S7.** Normalized changes in emission intensity of with the oligonucleotides **F21T** (A), **Fa2T** (B), **FkitT** (C), **FmycT** (D) ( $0.2 \mu\text{M}$ ,  $\lambda_{\text{ex}} = 470 \text{ nm}$ ) at  $515 \text{ nm}$  between  $20 \text{ }^\circ\text{C}$  and  $90 \text{ }^\circ\text{C}$  in presence of the ligands **5a** (1), **5b** (2), **5c** (3), **5d** (4) and **5e** (5) in aqueous KCl-LiCl-Na-cacodylate buffer ( $c_{\text{K}^+} = 10 \text{ mM}$ ,  $c_{\text{Na}^+} = 10 \text{ mM}$ ,  $c_{\text{K}^+} = 90 \text{ mM}$ ,  $\text{pH } 7.2$ ) at different ligand-DNA ratios (0, 1.3, 2.5, 5.0).

## 7. NMR spectra

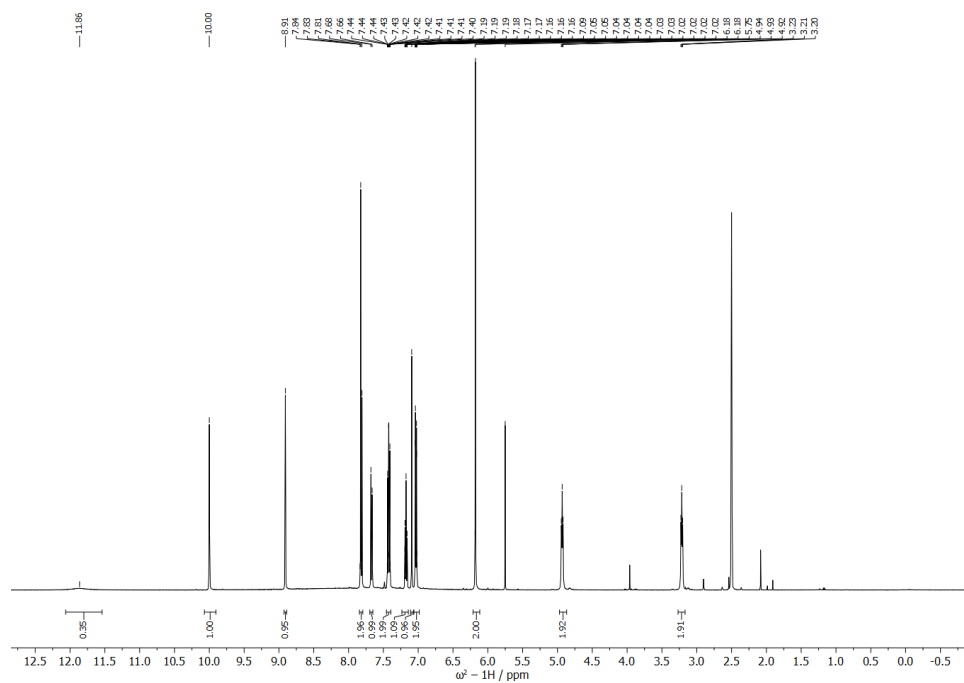

Figure S8.  $^1\text{H}$  NMR spectrum (500 MHz) of **4a** in  $\text{DMSO-}d_6 + \text{CF}_3\text{COOD}$ .

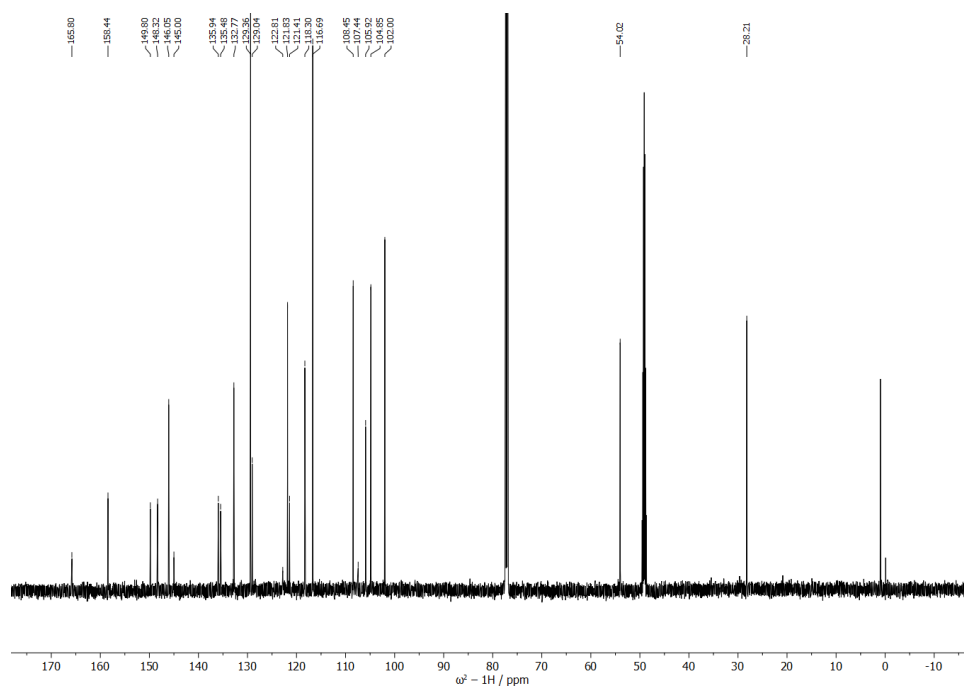

Figure S9.  $^{13}\text{C}$  NMR spectrum (125 MHz) of **4a** in  $\text{DMSO-}d_6 + \text{CF}_3\text{COOD}$ .

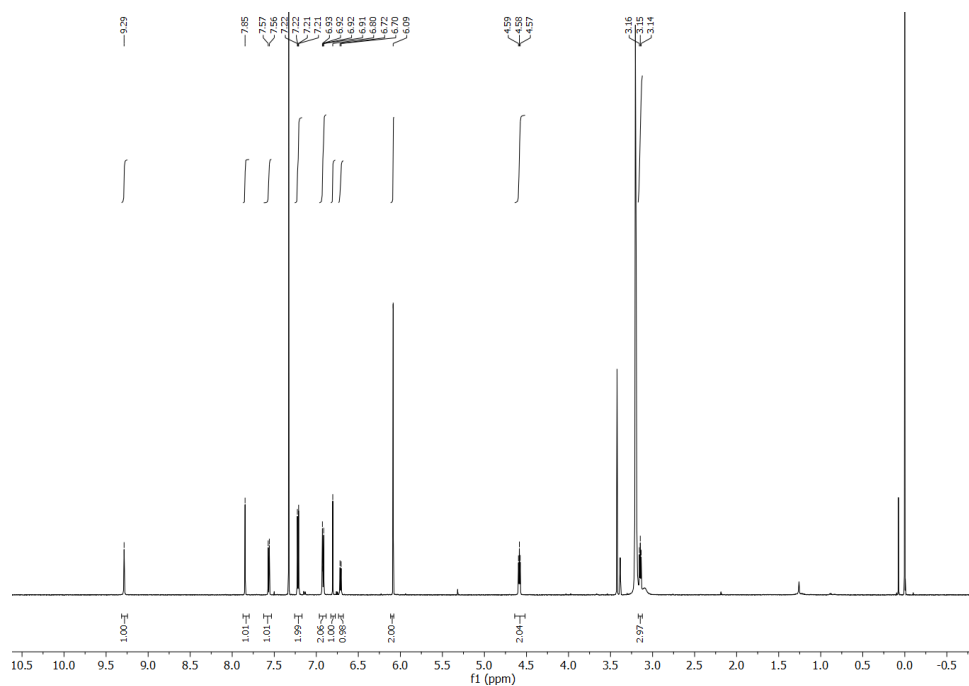

Figure S10.  $^1\text{H}$  NMR spectrum (500 MHz) of **4b** in  $\text{CDCl}_3$ .

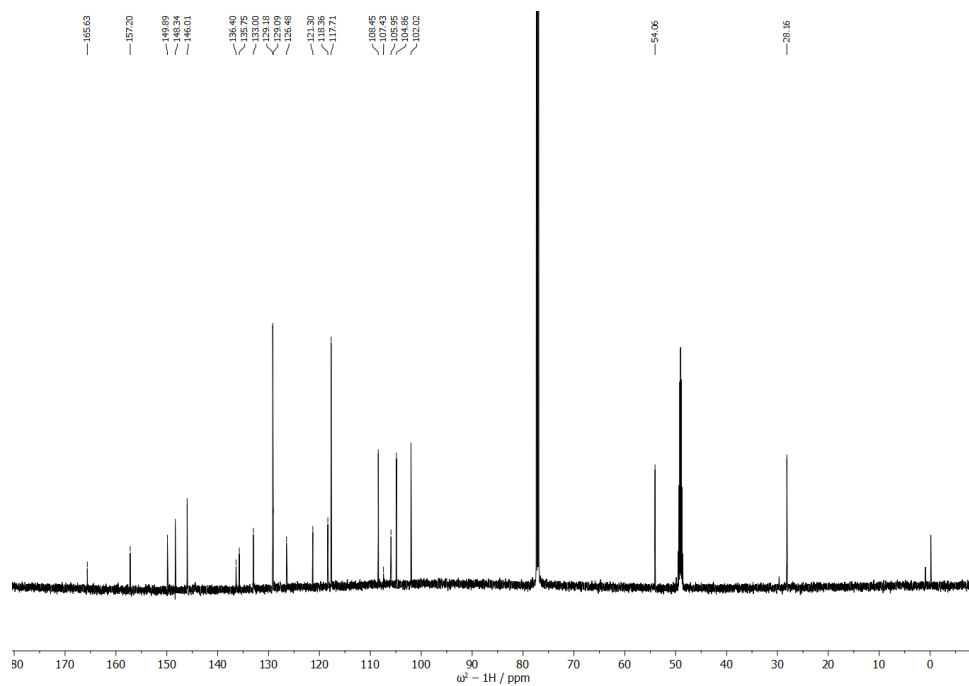

Figure S11.  $^{13}\text{C}$  NMR spectrum (125 MHz) of **4b** in  $\text{CDCl}_3$ .

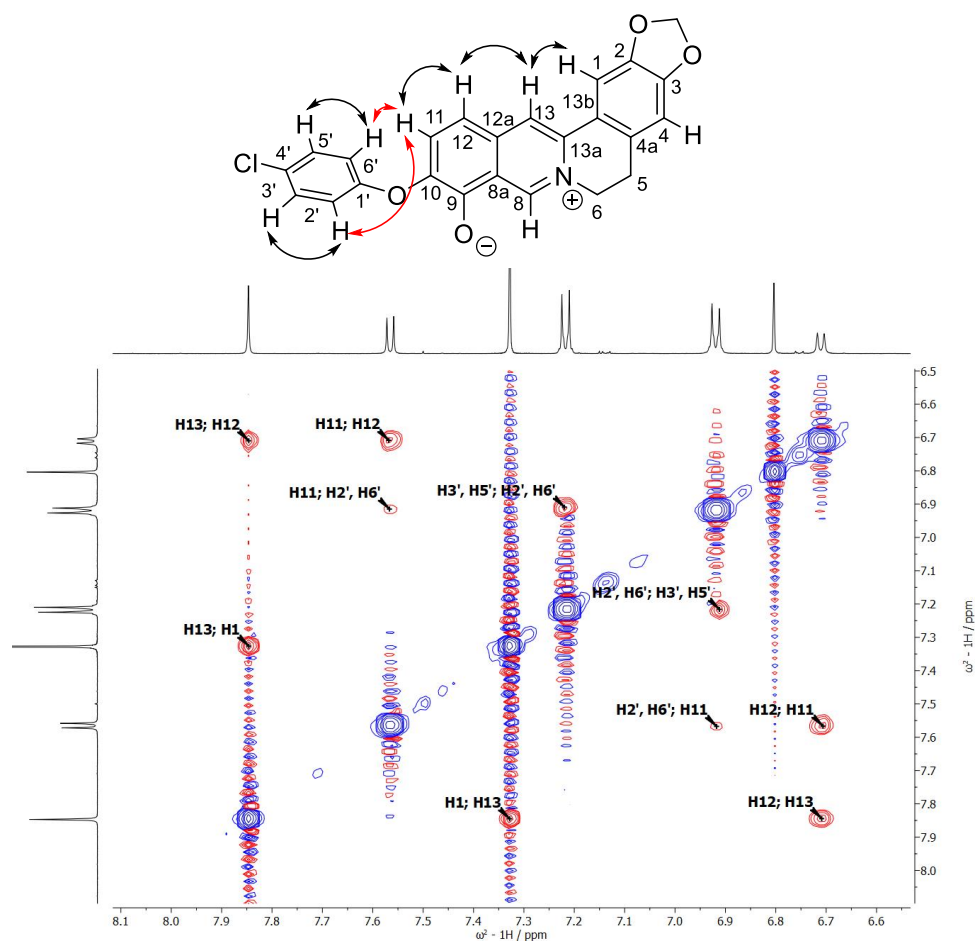

**Figure S12.** NOESY spectrum (500 MHz) of the aromatic region of **4b** in CDCl<sub>3</sub> and schematic representation of the NOE effects.

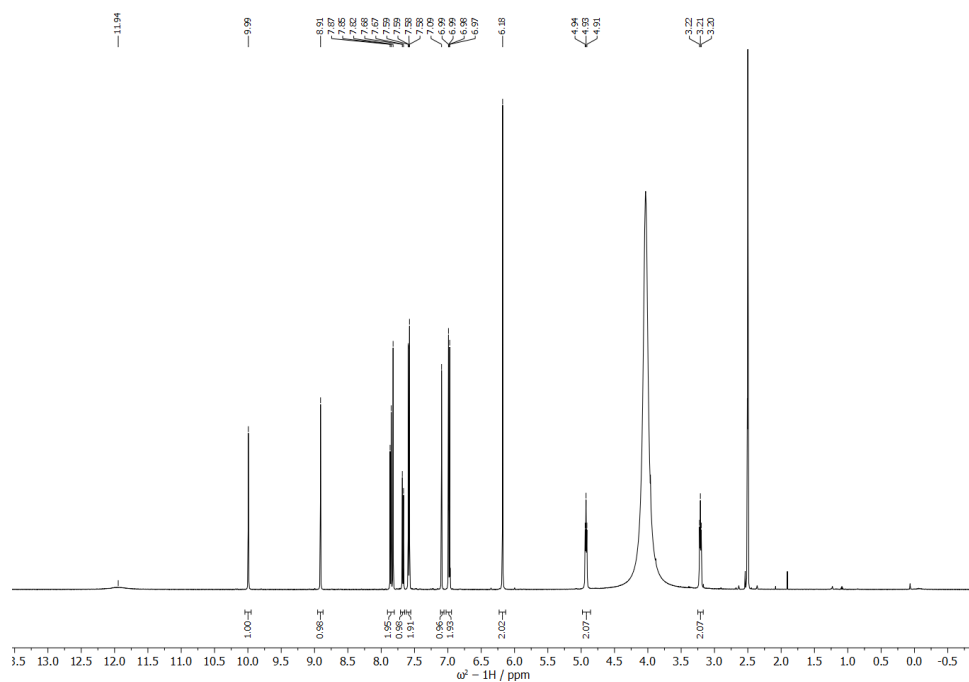

**Figure S13.**  $^1\text{H}$  NMR spectrum (500 MHz) of **4c** in  $\text{DMSO-}d_6 + \text{CF}_3\text{COOD}$ .

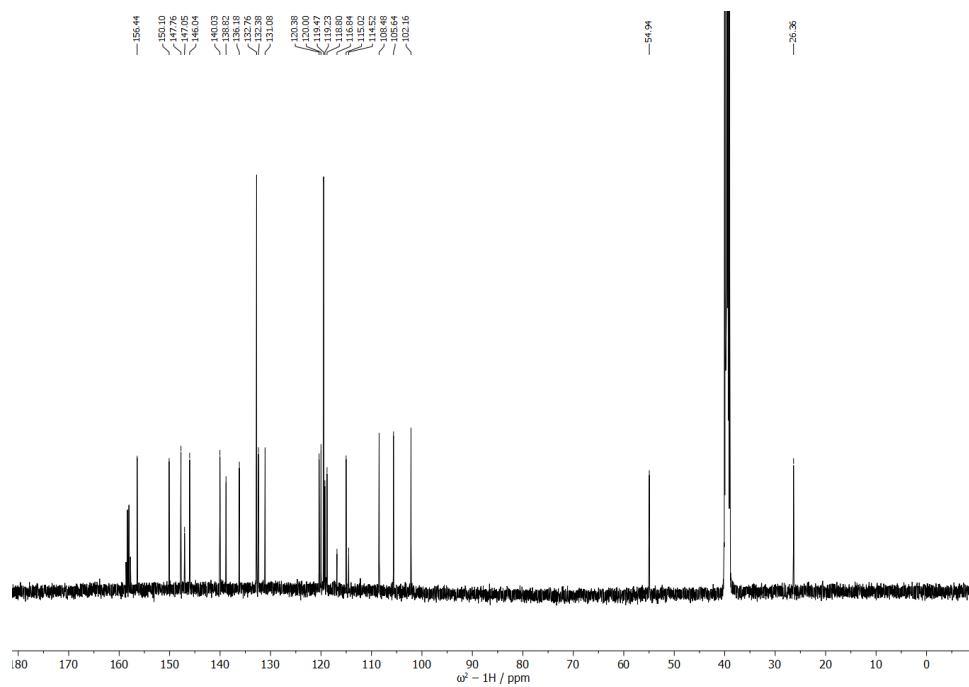

**Figure S14.**  $^{13}\text{C}$  NMR spectrum (125 MHz) of **4c** in  $\text{DMSO-}d_6 + \text{CF}_3\text{COOD}$ .



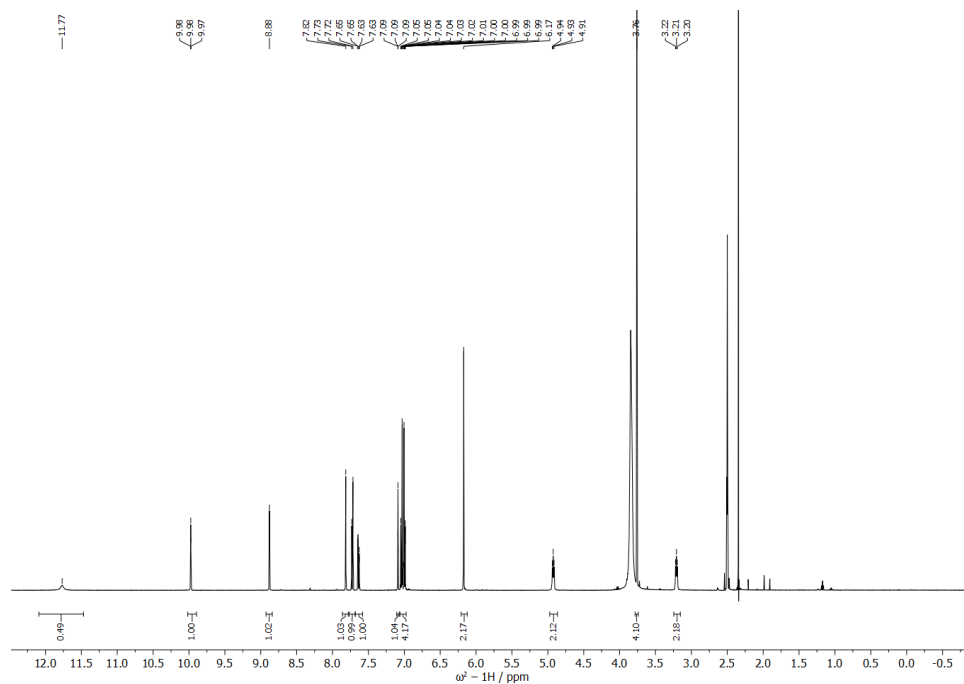

**Figure S15.**  $^1\text{H}$  NMR spectrum (500 MHz) of **4d** in  $\text{DMSO-}d_6 + \text{CF}_3\text{COOD}$ .

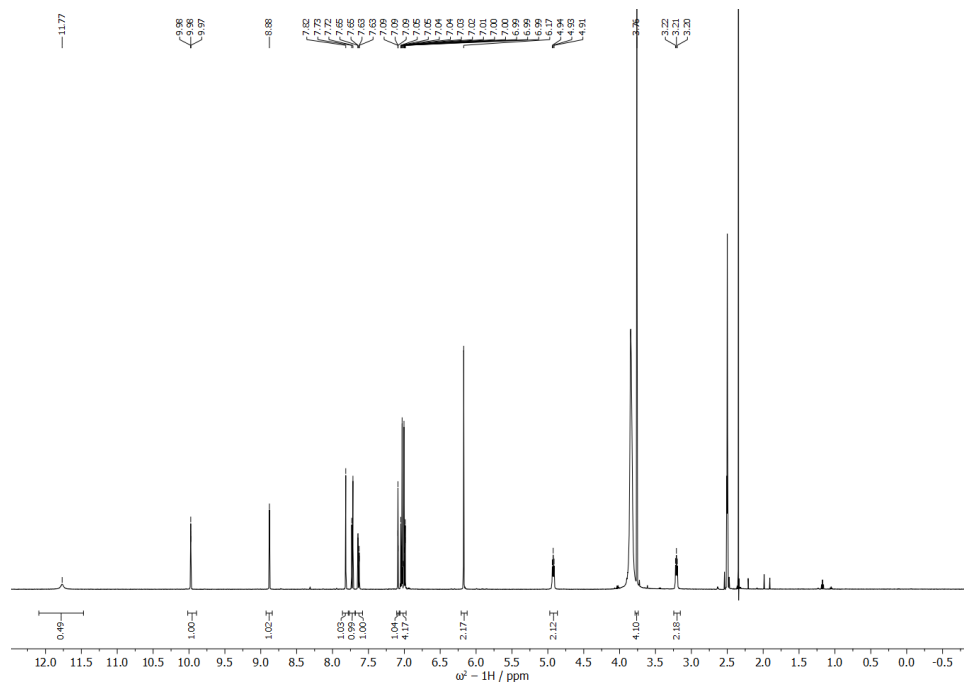

**Figure S16.**  $^{13}\text{C}$  NMR spectrum (125 MHz) of **4d** in  $\text{DMSO-}d_6 + \text{CF}_3\text{COOD}$ .

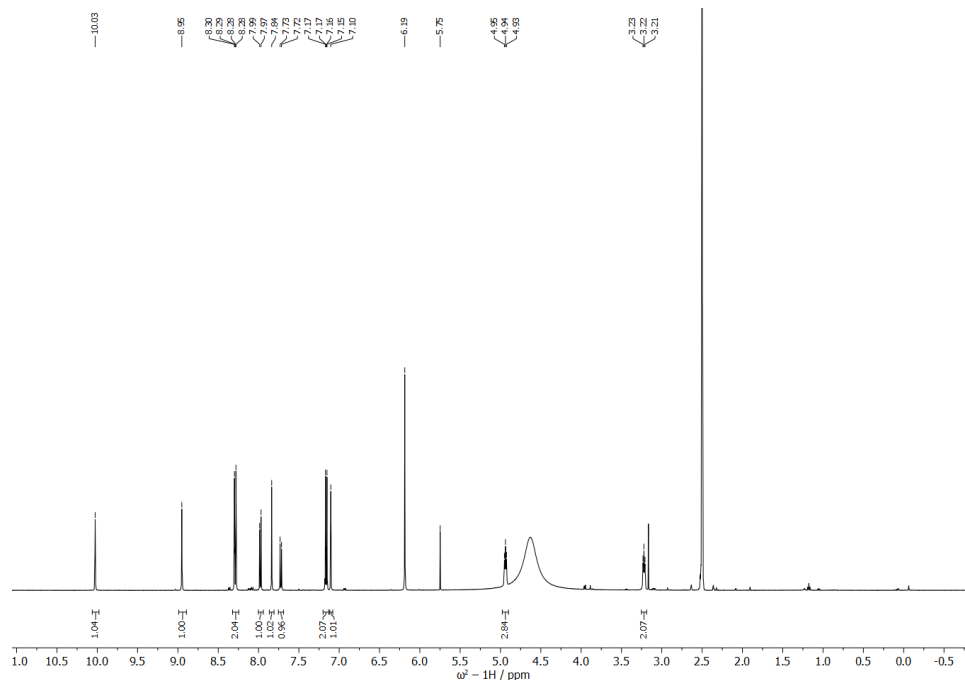

**Figure S17.**  $^1\text{H}$  NMR spectrum (500 MHz) of **4e** in  $\text{DMSO-}d_6 + \text{CF}_3\text{COOD}$ .

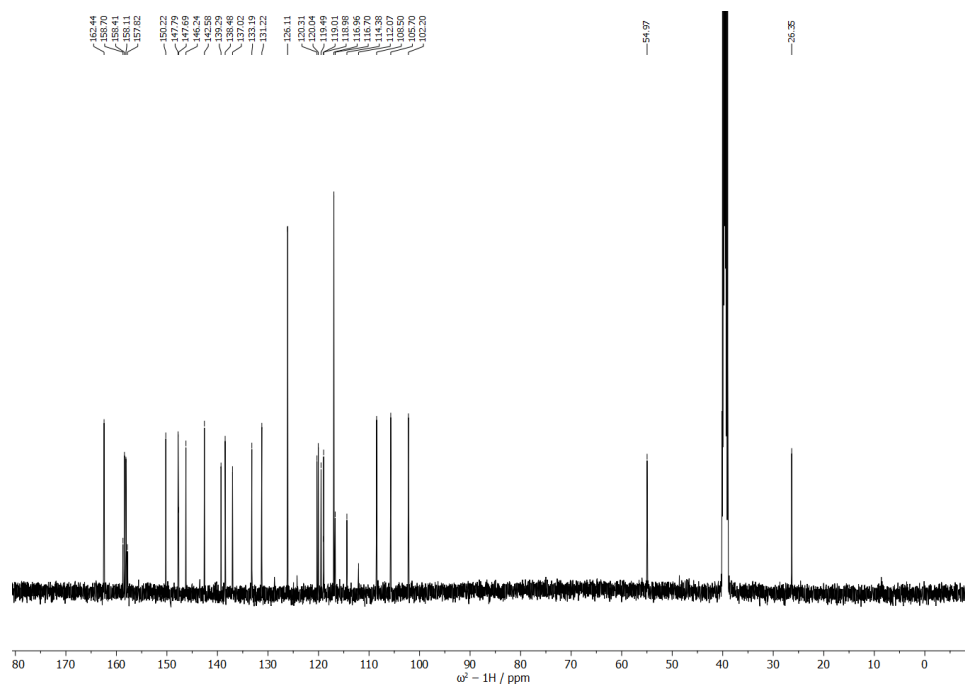

**Figure S18.**  $^{13}\text{C}$  NMR spectrum (125 MHz) of **4e** in  $\text{DMSO-}d_6 + \text{CF}_3\text{COOD}$ .

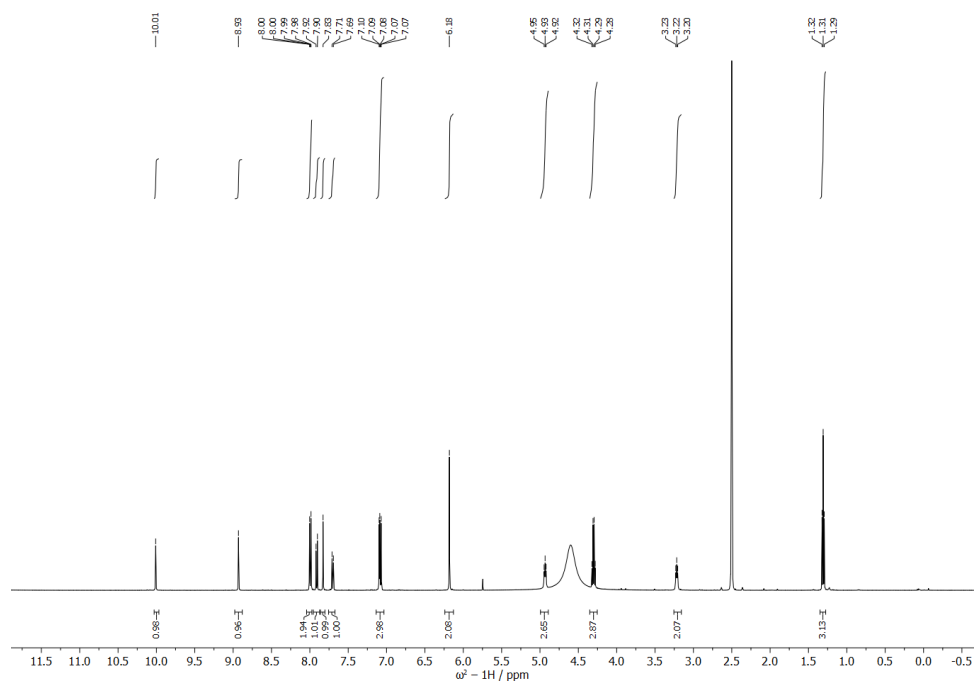

**Figure S19.**  $^1\text{H}$  NMR spectrum (500 MHz) of **4f** in  $\text{DMSO-}d_6 + \text{CF}_3\text{COOD}$ .

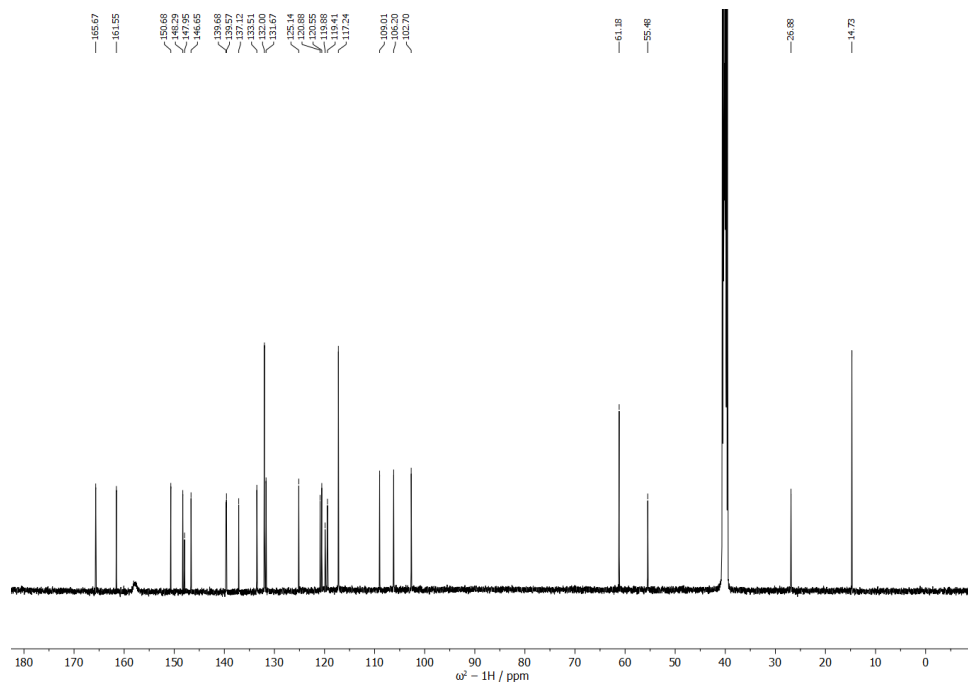

**Figure S20.**  $^{13}\text{C}$  NMR spectrum (125 MHz) of **4f** in  $\text{DMSO-}d_6 + \text{CF}_3\text{COOD}$ .

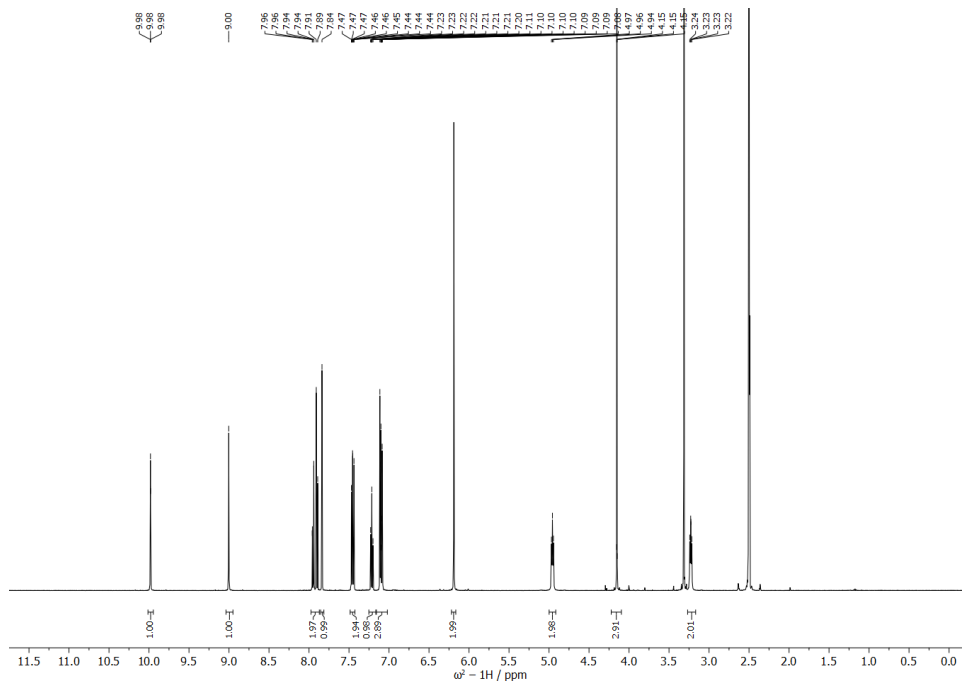

Figure S21.  $^1\text{H}$  NMR spectrum (500 MHz) of **5a** in  $\text{DMSO}-d_6$ .

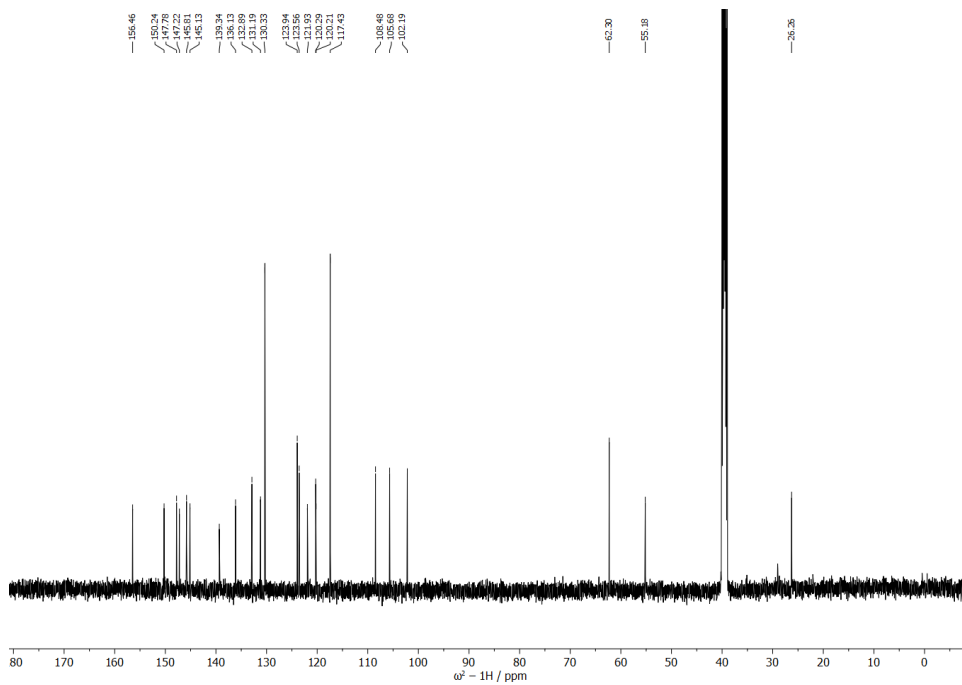

Figure S22.  $^{13}\text{C}$  NMR spectrum (125 MHz) of **5a** in  $\text{DMSO}-d_6$ .

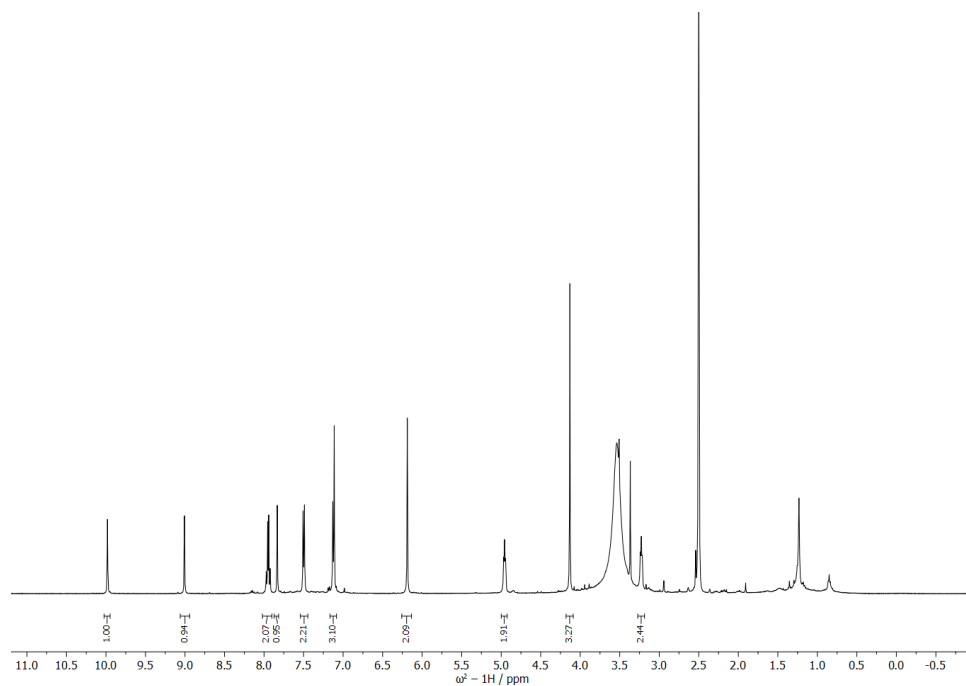

**Figure S23.**  $^1\text{H}$  NMR spectrum (500 MHz) of **5b** in  $\text{DMSO-}d_6$ .

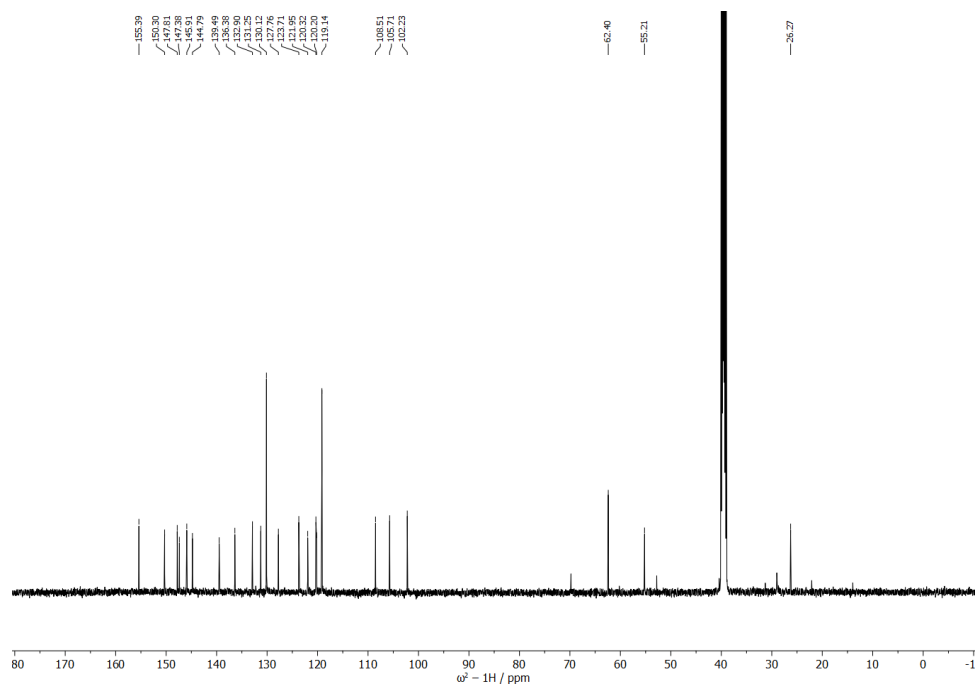

**Figure S24.**  $^{13}\text{C}$  NMR spectrum (125 MHz) of **5b** in  $\text{DMSO-}d_6$ .

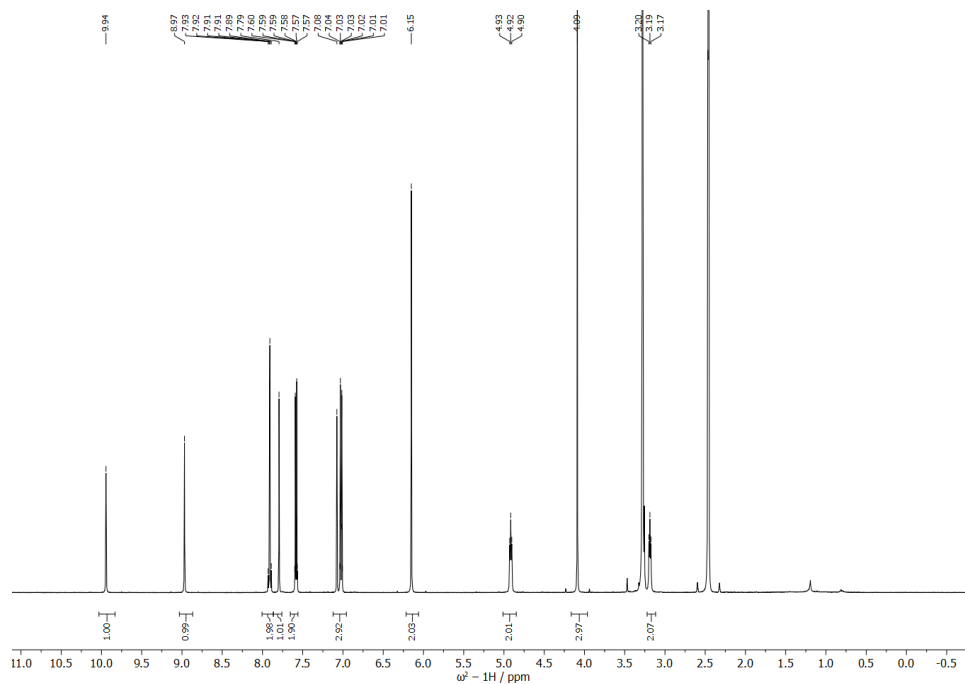

Figure S25.  $^1\text{H}$  NMR spectrum (500 MHz) of **5c** in  $\text{DMSO-}d_6$ .

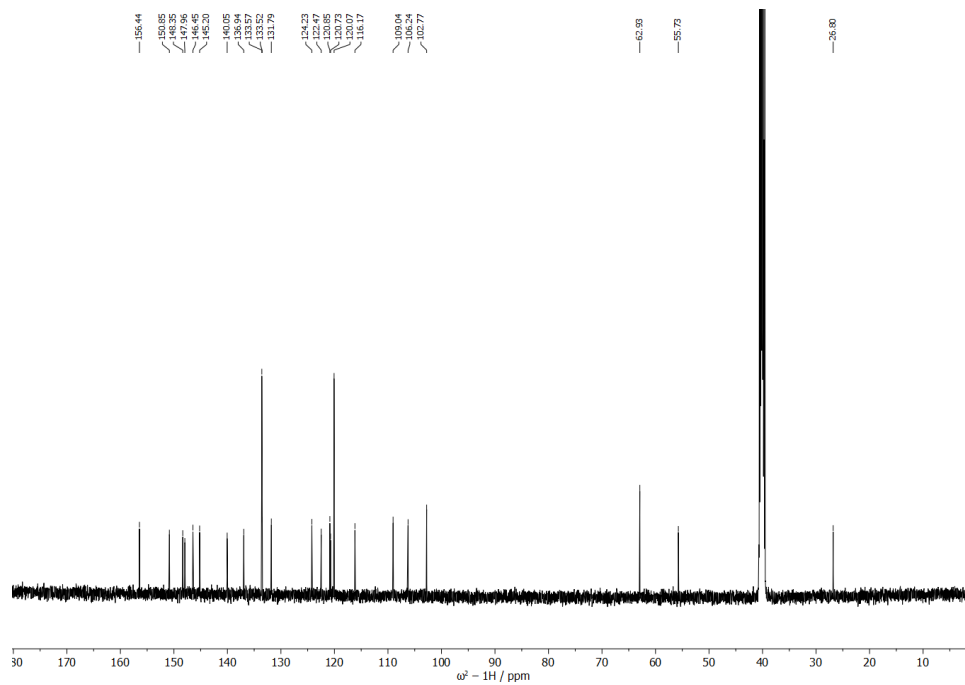

Figure S26.  $^{13}\text{C}$  NMR spectrum (125 MHz) of **5c** in  $\text{DMSO-}d_6$ .

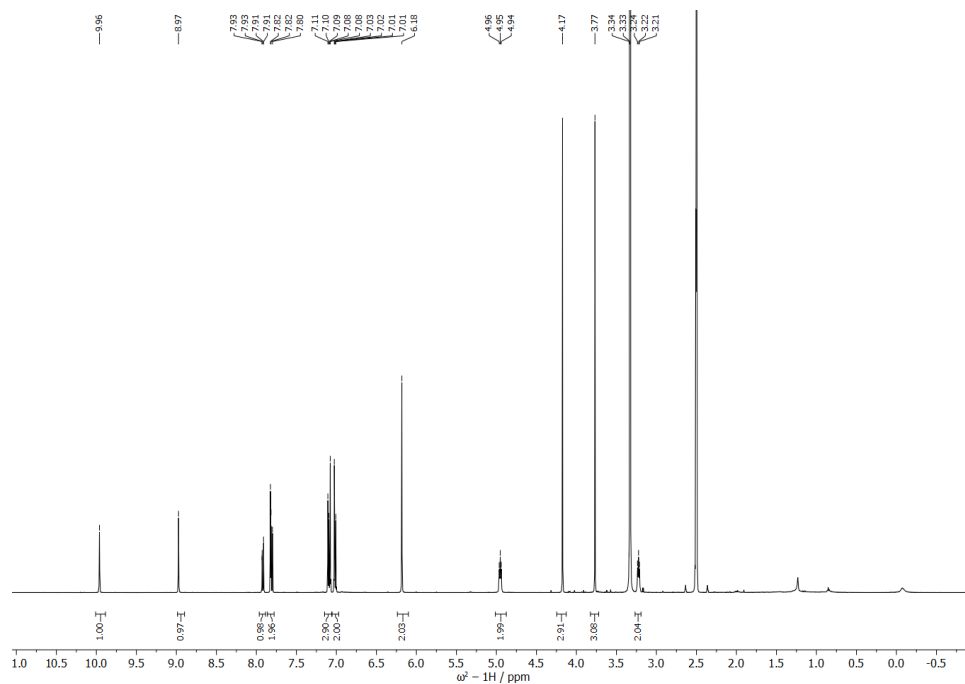

Figure S27.  $^1\text{H}$  NMR spectrum (500 MHz) of **5d** in  $\text{DMSO-}d_6$ .

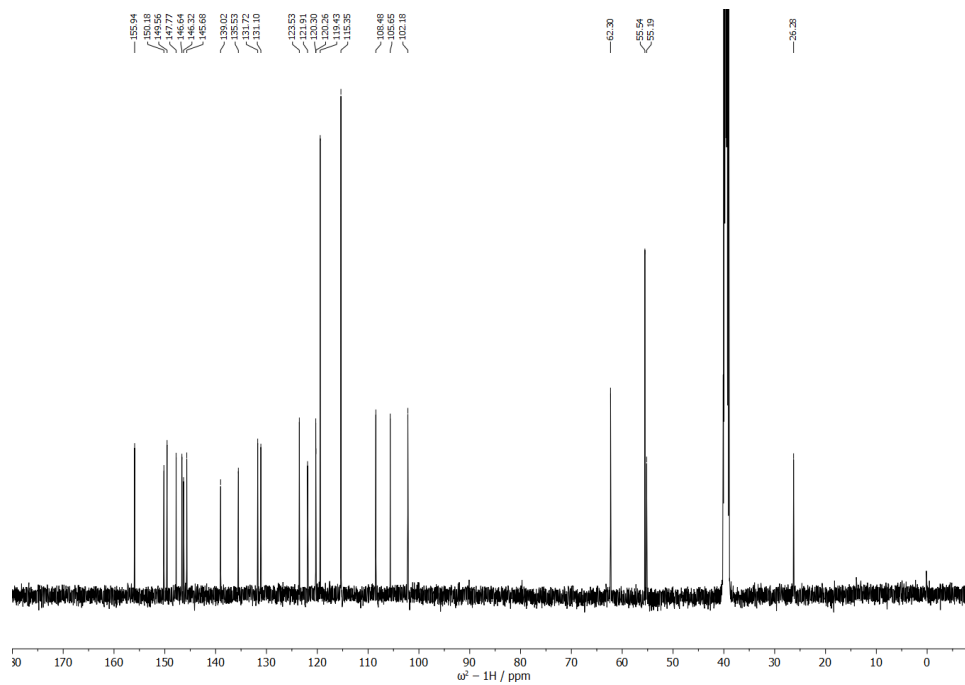

Figure S28.  $^{13}\text{C}$  NMR spectrum (125 MHz) of **5d** in  $\text{DMSO-}d_6$ .

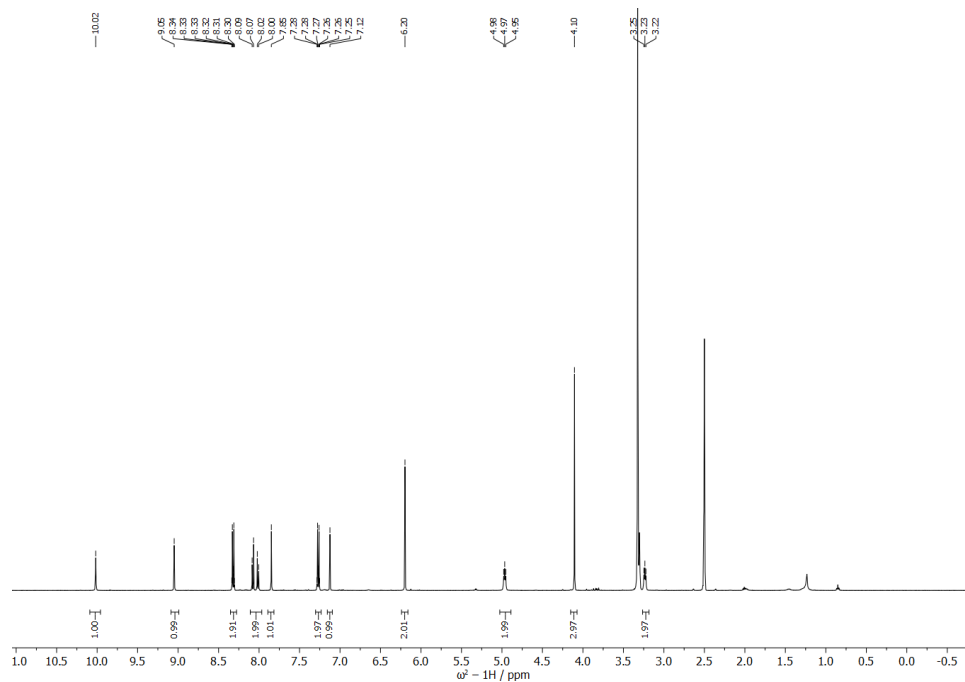

Figure S29.  $^1\text{H}$  NMR spectrum (500 MHz) of **5e** in  $\text{DMSO}-d_6$ .

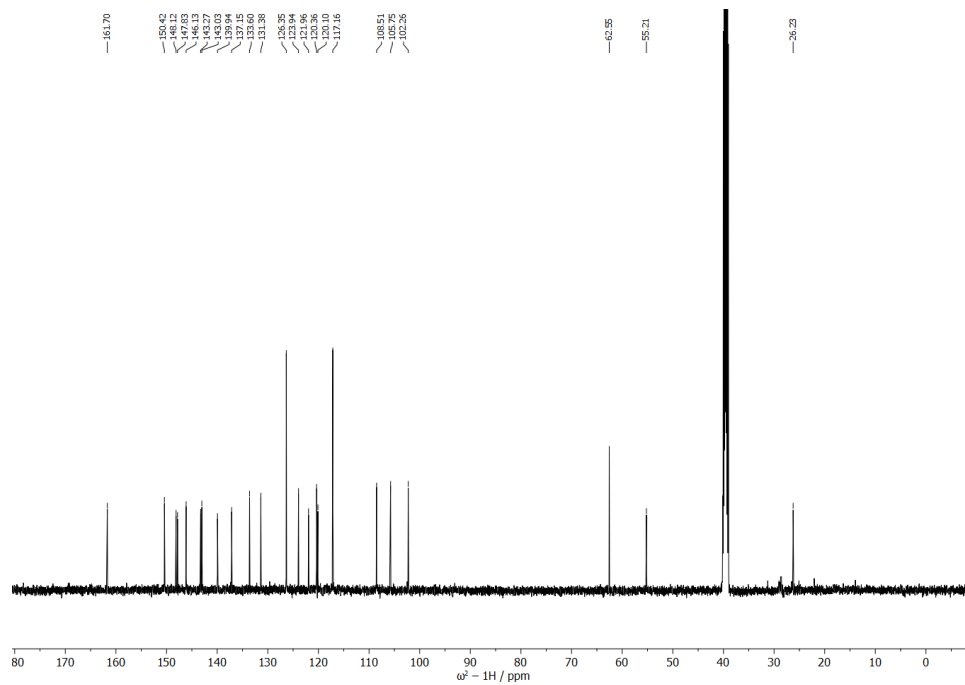

Figure S30.  $^{13}\text{C}$  NMR spectrum (125 MHz) of **5e** in  $\text{DMSO}-d_6$ .



## 8. References

1. Rurack, K.; Spieles, M. *Anal. Chem.* **2011**, *83*, 1232–1242.
2. Bortolozzi, R.; Ihmels, H.; Thomas, L.; Tian, M.; Viola, G. *Chem. Eur. J.* **2013**, *19*, 8736–8741.
3. Stootman, F. H.; Fisher, D. M.; Rodger, A.; Aldrich-Wright, J. R. *Analyst* **2006**, *131*, 1145–1151.
4. Doria, F.; Nadai, M.; Costa, G.; Sattin, G., Gallati, C.; Bergamaschi, G.; Moraca, F.; Alcaro, S.; Freccero, M.; Richter, S. N. *Eur. J. Org. Chem.* **2016**, 4824–4833.
5. Dzubieli, D.; Ihmels, H.; Mohamed M. A. M.; Thomas, L. *Beilstein J. Org. Chem.* **2014**, *10*, 2963–2974.
6. Carvalho, J.; Quintela, T.; Gueddouda, N. M.; Bourdoncle, A.; Mergny, J.-L.; Salgado, G. F.; Queiroz, J. A.; Cruz, C. *Org. Biomol. Chem.* **2018**, *16*, 2776–2786.
